# Supplementary material
Source: publisher figshare collection journal article supplement (https://acs.figshare.com/ndownloader/files/4076461)

## **SUPPORTING INFORMATION**

### **Protecting group-free concise synthesis of (RS)/(S)-lubeluzole**

*Damodara N. Kommi, Dinesh Kumar, Kapileswar Seth and Asit K. Chakraborti\**

Department of Medicinal Chemistry, National Institute of Pharmaceutical Education and Research (NIPER), Sector 67, S. A. S. Nagar 160 062, Punjab, India. \* Corresponding Author:

[akchakraborti@niper.ac.in](mailto:akchakraborti@niper.ac.in); [akchakraborti@rediffmail.com](mailto:akchakraborti@rediffmail.com)

## Contents

|                                                                                                                                                                                 |    |
|---------------------------------------------------------------------------------------------------------------------------------------------------------------------------------|----|
| General Information: .....                                                                                                                                                      | 3  |
| Optimization Study:.....                                                                                                                                                        | 4  |
| Optimization of amount of water during the epoxide ring opening of 2-((3,4-difluorophenoxy)methyl)oxirane (3) with 4-aminopiperidine (6) to form 7: .....                       | 4  |
| Optimization of amount of water during the <i>N</i> -arylation of 7 with 8 to form 9: .....                                                                                     | 4  |
| <i>N</i> -Methylation of 1-(4-(benzothiazol-2-ylamino)piperidin-1-yl)-3-(3,4-difluorophenoxy)propan-2-ol (9) to form lubeluzole (1):.....                                       | 5  |
| Selective <i>N</i> -Monomethylation of 1-(4-aminopiperidin-1-yl)-3-(3,4-difluorophenoxy)propan-2-ol (7) to form 10: ..                                                          | 6  |
| Influence of reaction medium during the base/metal-free <i>N</i> -arylation of 10 with 8 to form 1: .....                                                                       | 7  |
| Influence of solvent on the epoxide ring opening of epichlorohydrine (11) with 4-piperidone (12) to form 13: .....                                                              | 8  |
| Optimization of <i>O</i> -alkylation of 3,4-difluorophenol (14) with 13 to form 15: .....                                                                                       | 8  |
| Optimization of amount of base during the reaction of 14 with 13 <sup>a</sup> .....                                                                                             | 9  |
| Experimental Procedure .....                                                                                                                                                    | 10 |
| References .....                                                                                                                                                                | 15 |
| 1. Scanned NMR spectra .....                                                                                                                                                    | 16 |
| <sup>1</sup> H NMR of 2-((3,4-difluorophenoxy)methyl)oxirane (3).....                                                                                                           | 16 |
| <sup>1</sup> H NMR of 1-(4-aminopiperidin-1-yl)-3-(3,4-difluorophenoxy)propan-2-ol (7) .....                                                                                    | 17 |
| <sup>13</sup> C NMR of 1-(4-aminopiperidin-1-yl)-3-(3,4-difluorophenoxy)propan-2-ol (7).....                                                                                    | 18 |
| <sup>1</sup> H NMR of 1-(4-(benzothiazol-2-ylamino)piperidin-1-yl)-3-(3,4-difluorophenoxy)propan-2-ol (9) .....                                                                 | 19 |
| <sup>13</sup> C NMR of 1-(4-(benzothiazol-2-ylamino)piperidin-1-yl)-3-(3,4-difluorophenoxy)propan-2-ol (9) .....                                                                | 20 |
| <sup>1</sup> H NMR of lubeluzole (1) .....                                                                                                                                      | 21 |
| <sup>1</sup> H NMR of 1-(3,4-difluorophenoxy)-3-(4-(methylamino)piperidin-1-yl)propan-2-ol (10) .....                                                                           | 22 |
| <sup>13</sup> C NMR of 1-(3,4-difluorophenoxy)-3-(4-(methylamino)piperidin-1-yl)propan-2-ol (10) .....                                                                          | 23 |
| <sup>1</sup> H NMR of 1-(3-chloro-2-hydroxypropyl)piperidin-4-one (13).....                                                                                                     | 24 |
| <sup>13</sup> C NMR of 1-(3-chloro-2-hydroxypropyl)piperidin-4-one (13).....                                                                                                    | 25 |
| <sup>1</sup> H NMR of 1-(3-(3,4-difluorophenoxy)-2-hydroxypropyl)piperidin-4-one (15) .....                                                                                     | 26 |
| <sup>13</sup> C NMR of 1-(3-(3,4-difluorophenoxy)-2-hydroxypropyl)piperidin-4-one (15) .....                                                                                    | 27 |
| HPLC profile of ( <i>RS</i> )- 1-(3-(3,4-difluorophenoxy)-2-hydroxypropyl)piperidin-4-one (15) on Chiral Column.....                                                            | 28 |
| HPLC profile of ( <i>S</i> )- 1-(3-(3,4-difluorophenoxy)-2-hydroxypropyl)piperidin-4-one ( <i>S</i> -15) on Chiral Column.....                                                  | 29 |
| HPLC profile of ( <i>RS</i> )-Lubeluzole ( <i>S</i> -1) on Chiral Column .....                                                                                                  | 30 |
| HPLC profile of ( <i>S</i> )-Lubeluzole ( <i>S</i> -1) on Chiral Column.....                                                                                                    | 31 |
| Structure, IUPAC name, and mass-spectrometry-based identification and estimation of this side product 7a .....                                                                  | 32 |
| +ve ESI MS Spectra of reaction mixture .....                                                                                                                                    | 33 |
| “Ion current” measurement of mass peak 473.29 [M + H] <sup>+</sup> (corresponding to 7a) and the mass peak 287.20 [M + H] <sup>+</sup> (corresponding to 7) by +ve ESI MS ..... | 34 |

## General Information:

The glassware to be used in reactions was thoroughly washed and dried in an oven and the experiments were carried out with required precautions. Chemicals and all solvents were commercially available and used without further purification. The microwave reactions were carried out using CEM Discover System (Model No. 908010, Serial No. DU8952) with 7 mL sealed reaction vessels containing magnetic stir bar. The  $^1\text{H}$  and  $^{13}\text{C}$  NMR spectra were recorded on a 400 MHz NMR spectrometer in  $\text{CDCl}_3$  with residual undeuterated solvent ( $\text{CHCl}_3$ : 7.26/77.0) using TMS as an internal standard. Chemical shifts ( $\delta$ ) are given in ppm and  $J$  values are given in Hz.  $^{13}\text{C}$  NMR spectra were fully decoupled and were referenced to the middle peak of the solvent  $\text{CDCl}_3$  at 77.00 ppm. Splitting pattern were designated as s, singlet; bs, broad singlet; d, doublet; dd, doublet of doublet; t, triplet; m, multiplet. Mass spectra were recorded under APCI mode of ionisation. Accurate mass measurements were performed on a Q-TOF instrument calibrated internal with sodium formate. Infra-red (IR) spectra were recorded in the range  $4000\text{-}600\text{ cm}^{-1}$  either as neat for liquid or KBr pellets for solid samples. Purity compounds were checked on the silica gel GF-254 under UV at 254 nm. Melting points were measured using melting point apparatus and were uncorrected. Evaporation of solvents was performed at reduced pressure, using a rotary vacuum evaporator.

## Optimization Study:

Optimization of amount of water during the epoxide ring opening of 2-((3,4-difluorophenoxy)methyl)oxirane (**3**) with 4-aminopiperidine (**6**) to form **7**:

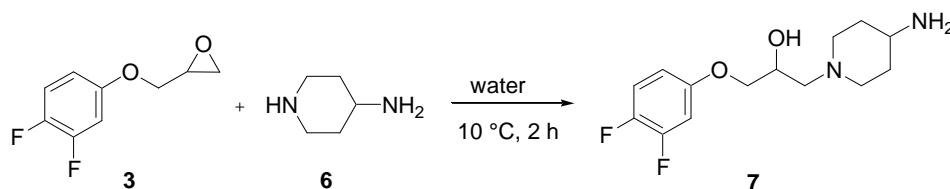

| Entry | Water           | Time (h) | Yield (%) <sup>b</sup> |
|-------|-----------------|----------|------------------------|
| 1     | 5 eq (0.09 mL)  | 2        | 20                     |
| 2     | 10 eq (0.18 mL) | 2        | 45                     |
| 2     | 15 eq (0.27 mL) | 2        | 75                     |
| 3     | 20 eq (0.36 mL) | 2        | 90                     |
| 5     | 1 mL            | 2        | 90                     |

<sup>a</sup>**3** (186 mg, 1 mmol) was treated with **6** (100 mg, 1 mmol, 1 equiv) in various amount of water at 10 °C for 2 h. <sup>b</sup>GCMS yield of **7**.

Optimization of amount of water during the *N*-arylation of **7** with **8** to form **9**:

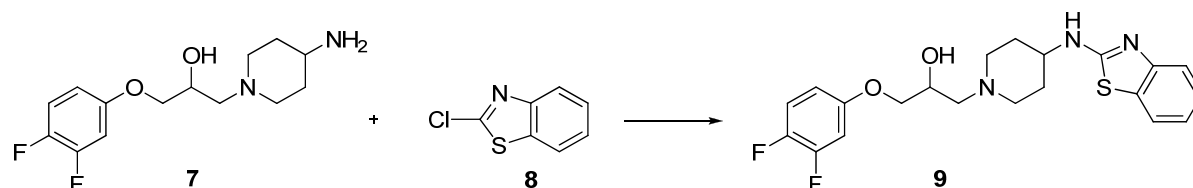

| Entry | Water           | Time (h) | Yield (%) <sup>b</sup> |
|-------|-----------------|----------|------------------------|
| 1     | 5 eq (0.09 mL)  | 10       | 55                     |
| 2     | 20 eq (0.18 mL) | 10       | 76                     |
| 3     | 55 eq (0.5 mL)  | 10       | 90                     |
| 5     | 1 mL            | 10       | 91                     |

<sup>a</sup>**7** (186 mg, 1 mmol) was treated with **8** (100 mg, 1 mmol, 1 equiv) in various amount of water at 110 °C for 10 h. <sup>b</sup>Isolated yield of **9**.

**N-Methylation of 1-(4-(benzothiazol-2-ylamino)piperidin-1-yl)-3-(3,4-difluorophenoxy)propan-2-ol (**9**) to form lubeluzole (**1**):**

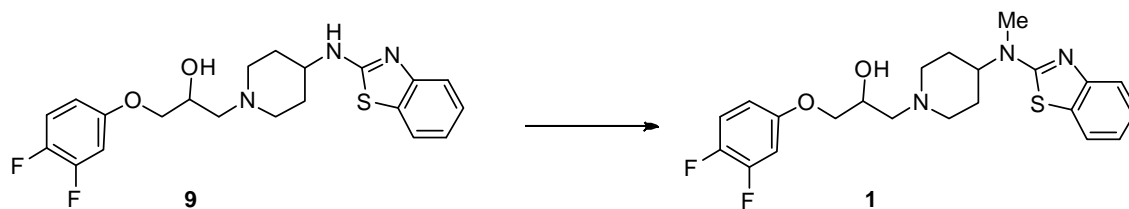

| Entry | Solvent (1 mL) | Methylating agent               | Base (1 equiv)                  | Time (h) | Yield (%) <sup>b</sup> |
|-------|----------------|---------------------------------|---------------------------------|----------|------------------------|
| 1     | Water          | MeI                             | none                            | 24       | 0                      |
| 2     | MeCN           | MeI                             | none                            | 24       | 0                      |
| 3     | DCM            | MeI                             | none                            | 24       | 0                      |
| 4     | 1,4-Dioxane    | MeI                             | none                            | 24       | 0                      |
| 5     | Toluene        | MeI                             | none                            | 24       | 0                      |
| 6     | MeOH           | MeI                             | none                            | 24       | 0                      |
| 7     | EtOH           | MeI                             | none                            | 24       | 0                      |
| 8     | Water          | MeI                             | K <sub>2</sub> CO <sub>3</sub>  | 4        | 10                     |
| 9     | DCM            | MeI                             | K <sub>2</sub> CO <sub>3</sub>  | 4        | 15                     |
| 10    | MeCN           | MeI                             | K <sub>2</sub> CO <sub>3</sub>  | 4        | 13                     |
| 11    | Water          | MeI                             | Cs <sub>2</sub> CO <sub>3</sub> | 4        | 10                     |
| 12    | MeCN           | MeI                             | Cs <sub>2</sub> CO <sub>3</sub> | 4        | 12                     |
| 13    | Water          | Me <sub>2</sub> SO <sub>4</sub> | LiOH.H <sub>2</sub> O           | 3        | 20                     |
| 14    | THF            | Me <sub>2</sub> SO <sub>4</sub> | LiOH.H <sub>2</sub> O           | 3        | 25                     |
| 15    | THF            | Me <sub>2</sub> SO <sub>4</sub> | NaH (1.3eq.)                    | 5        | 30                     |
| 16    | THF            | MeI                             | NaH (1.3eq.)                    | 5        | 70                     |
| 17    | Water          | DMC (100 °C)/MW                 | none                            | 30 min   | 0                      |
| 18    | Water          | DMDC (100 °C)/MW                | none                            | 30 min   | 0                      |
| 19    | THF            | DMC (100 °C)/MW                 | none                            | 30 min   | 0                      |

<sup>a</sup>**9** (419 mg, 1 mmol) was treated with the methylating agent (1.2 mmol, 1.2 equiv) at rt. <sup>b</sup>Isolated yield of **1**.

**Selective *N*-Monomethylation of 1-(4-aminopiperidin-1-yl)-3-(3,4-difluorophenoxy)propan-2-ol (**7**) to form **10**:**

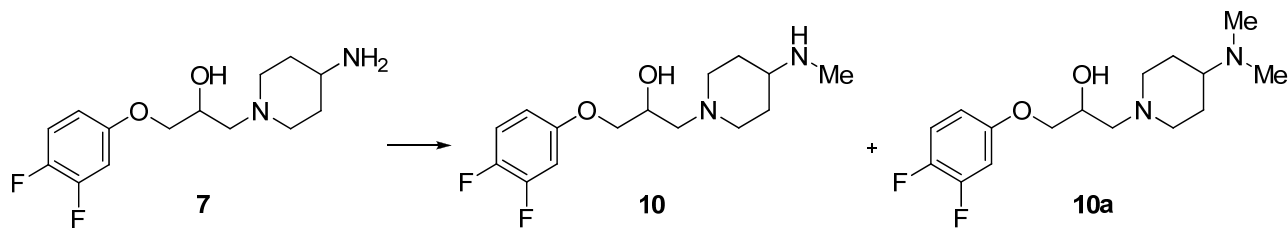

| Entry | Solvent                       | Methylating Agent                                                                       | Temp (°C) | Yield (%) <sup>b</sup> |            |
|-------|-------------------------------|-----------------------------------------------------------------------------------------|-----------|------------------------|------------|
|       |                               |                                                                                         |           | <b>10</b>              | <b>10a</b> |
| 1     | THF                           | Me <sub>2</sub> SO <sub>4</sub>                                                         | 70        | 0                      | 48         |
| 2     | Water                         | Me <sub>2</sub> SO <sub>4</sub>                                                         | rt        | 0                      | 40         |
| 3     | Water                         | MeI                                                                                     | rt        | 10                     | 35         |
| 4     | Water/1eq. NaHCO <sub>3</sub> | MeI                                                                                     | rt        | 5                      | 43         |
| 5     | Water                         | MeI                                                                                     | 5         | 16                     | 25         |
| 6     | Water/1eq. NaHCO <sub>3</sub> | MeI                                                                                     | 5         | 10                     | 35         |
| 7     | DCM                           | MeI                                                                                     | 5         | 0                      | 30         |
| 8     | Toluene                       | MeI                                                                                     | 5         | 7                      | 28         |
| 9     | 1,4-Dioxane                   | MeI                                                                                     | 5         | 10                     | 25         |
| 10    | THF                           | MeI                                                                                     | 5         | 12                     | 27         |
| 11    | MeOH                          | MeI                                                                                     | 5         | 0                      | 35         |
| 12    | EtOH                          | MeI                                                                                     | 5         | 0                      | 40         |
| 13    | <i>i</i> PrOH                 | MeI                                                                                     | 5         | 0                      | 38         |
| 14    | <i>t</i> BuOH                 | MeI                                                                                     | 5         | 0                      | 40         |
| 15    | EtOH                          | (CH <sub>2</sub> O) <sub>n</sub> /NaBH <sub>4</sub>                                     | reflux    | 55                     | 10         |
| 16    | EtOH                          | (CH <sub>2</sub> O) <sub>n</sub> /NaBH <sub>4</sub> /<br>Ti(O <sup><i>i</i></sup> Pr)   | reflux    | 75                     | 10         |
| 17    | Water                         | (CH <sub>2</sub> O) <sub>n</sub> /NaBH <sub>4</sub> /<br>Ti(O <sup><i>i</i></sup> Pr)   | 90        | 18                     | 10         |
| 18    | EtOH                          | (CH <sub>2</sub> O) <sub>n</sub> /NaCNBH <sub>3</sub> /<br>Ti(O <sup><i>i</i></sup> Pr) | reflux    | 75                     | 11         |
| 19    | water                         | DMC/MW                                                                                  | 100 °C    | 5                      | 0          |

<sup>a</sup>**7** (286 mg, 1 mmol) was treated with the methylating agent (1 mmol, 1 equiv) in the respective solvent (2 mL) for 5 h. <sup>b</sup>GCMS yield.

**Influence of reaction medium during the base/metal-free *N*-arylation of **10** with **8** to form **1**:**

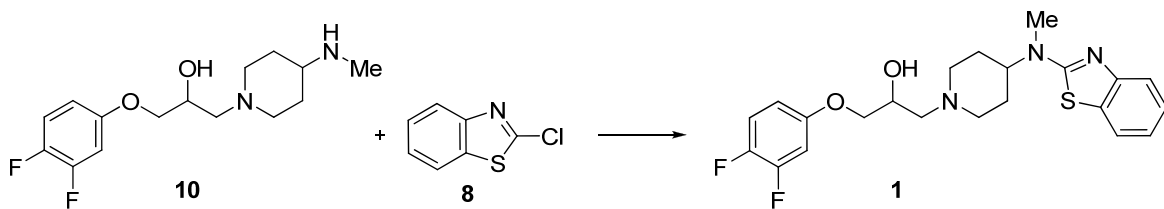

| Entry | Solvent           | Temp (°C) | Time (h) | Yield (%) <sup>b</sup> |
|-------|-------------------|-----------|----------|------------------------|
| 1     | Water             | rt        | 24       | 0                      |
| 2     | Water             | 60        | 24       | 0                      |
| 3     | Water             | reflux    | 12       | 65                     |
| 4     | Water/MW          | 120       | 30 min   | 84                     |
| 5     | DCM               | reflux    | 12       | 0                      |
| 6     | MeCN              | reflux    | 12       | 0                      |
| 7     | Toluene           | reflux    | 12       | 10                     |
| 8     | THF               | reflux    | 12       | 0                      |
| 9     | MeNO <sub>2</sub> | 110       | 12       | 12                     |
| 10    | 1,4-Dioxane       | reflux    | 12       | 10                     |
| 11    | MeOH              | reflux    | 12       | 0                      |
| 12    | EtOH              | reflux    | 12       | trace                  |
| 13    | TFE               | reflux    | 12       | 15                     |
| 14    | DMF/MW            | 120       | 30 min   | 65                     |
| 15    | 1,4-dioxane/MW    | 120       | 30 min   | 60                     |
| 16    | Toluene/MW        | 120       | 30 min   | 54                     |
| 17    | Neat/MW           | 120       | 30 min   | 51                     |
| 18    | Neat              | 110       | 30 min   | 10                     |

<sup>a</sup>**10** (300 mg, 1 mmol) was treated with **8** (168 mg, 1 mmol, 1 equiv) in the respective solvent (1 mL) under indicated condition. <sup>b</sup>Isolated yield of **1**.

**Influence of solvent on the epoxide ring opening of epichlorohydrine (11) with 4-piperidone (12) to form 13:**

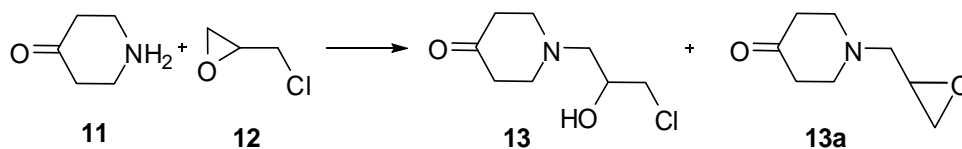

| Entry | Solvent           | Yield (%) <sup>b</sup> |
|-------|-------------------|------------------------|
| 1     | Water             | 96                     |
| 2     | MeOH              | 32                     |
| 3     | EtOH              | 28                     |
| 4     | <i>i</i> PrOH     | 25                     |
| 5     | <i>t</i> BuOH     | 27                     |
| 6     | TFE               | 82 <sup>c</sup>        |
| 7     | 1,4-Dioxane       | trace                  |
| 8     | THF               | trace                  |
| 9     | MeCN              | trace                  |
| 10    | DMF               | trace                  |
| 11    | Toluene           | trace                  |
| 12    | MeNO <sub>2</sub> | trace                  |

<sup>a</sup>**11** (92 mg, 1 mmol) was treated with **12** (99 mg, 1 mmol, 1 equiv) in different solvents (1 mL) at rt for 1 h. <sup>b</sup>Isolated yield of **13**. <sup>c</sup>The side product **13a** arising through substitution of the chlorine was formed in 13% yield.

**Optimization of *O*-alkylation of 3,4-difluorophenol (14) with 13 to form 15:**

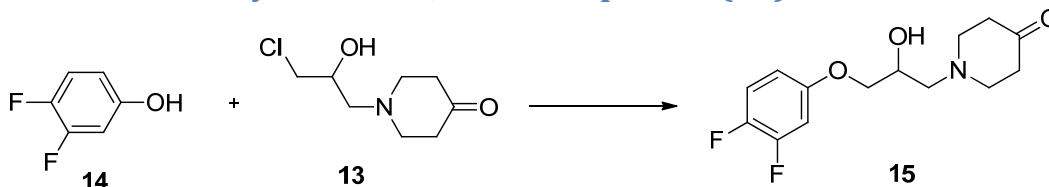

| Entry | Base<br>(1.5 equiv)             | Surfactant<br>(20 mol%) | temp (°C) | time (h) | Yield (%) <sup>b</sup> |
|-------|---------------------------------|-------------------------|-----------|----------|------------------------|
| 1     | None                            | SDOSS                   | rt        | 10       | 0                      |
| 2     | None                            | SDOSS                   | reflux    | 10       | 0                      |
| 3     | None                            | TBAI                    | reflux    | 10       | 0                      |
| 4     | K <sub>2</sub> CO <sub>3</sub>  | --                      | rt        | 10       | 0                      |
| 5     | K <sub>2</sub> CO <sub>3</sub>  | --                      | 60        | 5        | 78                     |
| 6     | K <sub>2</sub> CO <sub>3</sub>  | --                      | 80        | 5        | 95                     |
| 7     | Cs <sub>2</sub> CO <sub>3</sub> | --                      | rt        | 10       | --                     |
| 8     | Cs <sub>2</sub> CO <sub>3</sub> | --                      | 60        | 5        | 80                     |



|    |                                 |    |     |     |    |
|----|---------------------------------|----|-----|-----|----|
| 9  | Cs <sub>2</sub> CO <sub>3</sub> | -- | 80  | 5   | 95 |
| 10 | K <sub>2</sub> CO <sub>3</sub>  | -- | 100 | 0.5 | 93 |

<sup>a</sup>**14** (130 mg, 1 mmol) was treated with **13** (191 mg, 1 mmol, 1 equiv) in water (1 mL). <sup>b</sup>Isolated yield of **15**.

#### Optimization of amount of base during the reaction of **14** with **13**<sup>a</sup>

| Entry | K <sub>2</sub> CO <sub>3</sub> (equiv) | Yield (%) <sup>b</sup> |
|-------|----------------------------------------|------------------------|
| 1     | 1                                      | 82                     |
| 2     | 1.5                                    | 95                     |
| 3     | 2                                      | 95                     |

<sup>a</sup>**14** (130 mg, 1 mmol) was treated with **13** (191 mg, 1 mmol) in the presence of K<sub>2</sub>CO<sub>3</sub> in water (1 mL). <sup>b</sup>Isolated yield of **15**.

## Experimental Procedure

**Typical experimental procedure for the synthesis of 2-((3,4-difluorophenoxy)methyl)oxirane (3):** The mixture of 3,4-difluorophenol (**14**) (2.6 g, 20 mmol), epichlorohydrine (**11**) (2.76 g, 30 mmol, 1.5 equiv) and K<sub>2</sub>CO<sub>3</sub> (5.56 g, 50 mmol, 2 equiv) in acetonitrile (50 mL) was stirred magnetically under reflux condition (14 h, TLC). The reaction mixture was filtered off and concentrated under rotary vacuum evaporation. The crude product was adsorbed on silica gel (230-400, 5 g) and purified by flash chromatography (hexane-EtOAc, 95:5) to obtain analytically pure **3** (3.05 g, 82 %); Brown oil; <sup>1</sup>H NMR (CDCl<sub>3</sub>, 400 MHz)  $\delta$ : 7.05 (q,  $J$  = 9.16 Hz, 1H), 6.77-6.72 (m, 1H), 6.64-6.60 (m, 1H), 4.21 (dd,  $J$  = 2.8, 10.8 Hz, 1H), 3.87 (dd,  $J$  = 5.88, 11.0 Hz, 1H), 3.35-3.31 (m, 1H), 2.91 (t,  $J$  = 4.44 Hz, 1H), 2.74 (dd,  $J$  = 2.64, 4.80 Hz, 1H); MS (APCI)  $m/z$  187.1 (M+H)<sup>+</sup>.<sup>1</sup>

**Typical experimental procedure for the 1-(4-aminopiperidin-1-yl)-3-(3,4-difluorophenoxy)propan-2-ol (7):** The mixture of **3** (1.86 g, 10 mmol), 4-aminopiperidine (**6**) (1.0 g, 10 mmol, 1 equiv) in water (4 mL) was stirred magnetically at 10 °C. After completion of reaction (1 h, TLC), the reaction mixture was extracted with EtOAc (2  $\times$  10 mL). The combined EtOAc extracts were dried (MgSO<sub>4</sub>), and concentrated under rotary vacuum evaporation. The crude product was adsorbed on silica gel (230-400, 2.5 g) and purified by flash chromatography (hexane-EtOAc, 5: 95) to obtain analytically pure **7** (2.54 g, 89 %); Brown liquid; IR (Neat)  $\nu$ : 3390, 3331, 3290, 2995, 2854, 1601, 1228, 1125 cm<sup>-1</sup>; <sup>1</sup>H NMR (CDCl<sub>3</sub>, 400 MHz)  $\delta$ : 7.09-7.01 (m, 1H, Ar-H), 6.78-6.72 (m, 1H, Ar-H), 6.64-6.61 (m, 1H, Ar-H), 4.04-4.01 (m, 1H, CH), 3.92-3.88 (m, 2H, CH<sub>2</sub>), 2.98-2.88 (m, 1H, CH<sub>2</sub>), 2.87-2.82 (m, 1H, CH<sub>2</sub>), 2.79-2.69 (m, 1H, CH<sub>2</sub>), 2.55-2.44 (m, 2H, CH), 2.43-2.35 (m, 2H, CH<sub>2</sub>), 2.10-1.97 (m, 1H, CH<sub>2</sub>), 1.84-1.81 (m, 1H, CH<sub>2</sub>), 1.47-1.33 (m, 2H, CH<sub>2</sub>); <sup>13</sup>C NMR (CDCl<sub>3</sub>, 100 MHz)  $\delta$ : 155.0 (d,  $J$  = 9 Hz), 150.4 (dd,  $J$  = 14 & 246 Hz), 145.1 (dd,  $J$  = 12 & 239 Hz), 117.1 (d,  $J$  = 19 Hz), 109.8, 104.24 (d,  $J$  = 20 Hz), 71.2, 65.5, 60.2, 53.9, 51.4, 48.4; HRMS (ESI)  $m/z$  calcd for C<sub>14</sub>H<sub>20</sub>F<sub>2</sub>N<sub>2</sub>NaO<sub>2</sub> [M + Na<sup>+</sup>], 309.3074; Found 309.1100.

**Typical experimental procedure for the 1-(4-(benzothiazol-2-ylamino)piperidin-1-yl)-3-(3,4-difluorophenoxy)propan-2-ol (9):** The mixture of **7** (0.85 g, 3 mmol), 2-chlorobenzthiazole (**8**) (0.50 g, 3 mmol, 1 equiv) in water (8 mL) was stirred magnetically under at 110 °C (oil-bath) for 10 h (TLC). The reaction mixture cooled to room temperature and treated with NaHCO<sub>3</sub> till the effervescence ceases and extracted with EtOAc (2 × 5 mL). The combined EtOAc extracts were dried (MgSO<sub>4</sub>), and concentrated under rotary vacuum evaporation. The crude product was adsorbed on silica gel (230-400, 500 mg) and purified by flash chromatography (hexane-EtOAc, 90:10) to obtain analytically pure **9** (1.14 g, 91%). IR (Neat)  $\nu$ : 3389, 3012, 2975, 2850, 1605, 1215, 1045 cm<sup>-1</sup>; <sup>1</sup>H NMR (CDCl<sub>3</sub>, 400 MHz)  $\delta$ : 7.58 (d,  $J$  = 7.88 Hz, 1H, Ar-H), 7.53 7.05 (d,  $J$  = 8.0 Hz, 1H, Ar-H), 7.32-7.27 (m, 1H, Ar-H), 7.11-7.02 (m, 2H, Ar-H), 6.78-6.73 (m, 1H, Ar-H), 6.64-6.60 (m, 1H, Ar-H), 5.15 (brs, 1H, OH), 4.10-4.04 (m, 1H, CH), 3.96-3.90 (m, 2H, CH<sub>2</sub>), 3.75 (brs, 1H, NH), 3.03-3.00 (m, 1H, CH), 2.86-2.83 (m, 1H, CH), 2.73-2.50 (m, 3H, CH), 2.29-2.20 (m, 1H, CH), 2.20-2.17 (m, 1H, CH), 1.67-1.58 (m, 1H, CH); <sup>13</sup>C NMR (CDCl<sub>3</sub>, 100 MHz)  $\delta$ : 168.6, 155.1 (d,  $J$  = 9 Hz), 152.9, 150.4 (dd,  $J$  = 14 & 247 Hz), 145.2 (dd,  $J$  = 12 & 239 Hz), 130.4, 125.9, 120.9, 120.5, 118.7, 117.1 (d,  $J$  = 18 Hz), 109.9, 104.3 (d,  $J$  = 21 Hz), 71.2, 65.8, 60.2, 57.8, 54.8, 51.8; HRMS (ESI)  $m/z$  calcd for C<sub>21</sub>H<sub>24</sub>F<sub>2</sub>N<sub>3</sub>O<sub>2</sub>S [M + H<sup>+</sup>], 420.1557; Found 420.1559.

**Typical experimental procedure for the synthesis of 1-(4-(benzothiazol-2-ylamino)piperidin-1-yl)-3-(3,4-difluorophenoxy)propan-2-ol (9) under microwave condition (The microwave reactions was carried out using CEM Discover System (Model No. 908010, Serial No. DU8952) with 7 mL sealed reaction vessel):** The mixture of **7** (0.28 g, 1 mmol), **8** (0.17 g, 1 mmol, 1 equiv) in water (2 mL) was placed in the microwave reaction vessel (7 mL) containing the magnetic stir bar. The microwave is programmed using the ramp-to-temperature method to heat to 110 °C over 5 min period and then held at this temperature for 30 min. The solution was then allowed to cool for 20 min or until it is below 50 °C before removal from microwave unit. The resultant reaction mixture was cooled to room temperature, treated with NaHCO<sub>3</sub> till the effervescence ceases and extracted with EtOAc (2 × 5 mL). The combined EtOAc extracts were dried (MgSO<sub>4</sub>), and concentrated under rotary vacuum evaporation. The crude product was adsorbed on silica gel (230-400, 250 mg) and purified by flash chromatography (hexane-EtOAc, 90:10) to obtain analytically pure 1-(4-(benzothiazol-2-ylamino)piperidin-1-yl)-3-(3,4-difluorophenoxy)propan-2-ol (0.37 g, 88%).

**Typical experimental procedure for the synthesis of Lubeluzole (1) through N-methylation of 9:** The mixture of **9** (0.49 g, 1 mmol), methyl iodide (0.17 g, 1.2 mmol, 1.2 equiv) and NaH (0.03 g, 1.3 mmol, 1.3 equiv) in THF (2 mL) was stirred magnetically under at rt for 5 h. To the reaction mixture EtOAc (3 mL) was added and concentrated under rotary vacuum evaporation. The crude product was adsorbed on silica gel (230-400, 250 mg) and purified by flash chromatography (hexane-EtOAc, 80:20) to obtain analytically pure **1** (0.3 g, 70%); mp = 231-233 °C; IR (Neat)  $\nu$ : 3385, 3009, 2985, 2855, 1603, 1218, 1115, 1052  $\text{cm}^{-1}$ ;  $^1\text{H}$  NMR ( $\text{CDCl}_3$ , 400 MHz)  $\delta$ : 7.61-7.55 (m, 2H), 7.31-7.27 (m, 1H), 7.10-7.03 (m, 2H), 6.79-6.74 (m, 1H), 6.64-6.62 (m, 1H), 4.15-4.10 (m, 1H), 4.09-4.06 (m, 1H), 3.96-3.90 (m, 2H), 3.24 (brs, 1H), 3.14-3.12 (m, 1H), 3.07 (s, 3H), 3.00-2.97 (m, 1H), 2.62-2.49 (m, 3H), 2.26-2.20 (m, 1H), 1.97-1.94 (m, 1H), 1.92-1.86 (m, 3H). MS (APCI)  $m/z$ : 434.2 ( $\text{M}+\text{H}^+$ ).<sup>1</sup>

**Typical experimental procedure for the synthesis of 1-(3,4-difluorophenoxy)-3-(4-(methylamino)piperidin-1-yl)propan-2-ol (10):** The mixture of **7** (0.85 g, 3 mmol), paraformaldehyde (2 equiv) and titanium(IV) isopropoxide (6 mmol, 2 equiv) in EtOH (4 mL) was stirred magnetically under reflux condition. After completion of reaction (3 h, TLC), cool the reaction mixture to 20 °C followed by addition of  $\text{NaBH}_4$  (4.5 mmol, 1.5 equiv) and continue the stirring for further 2 h. The crude reaction mixture was concentrated under rotary vacuum evaporation and added EtOAc (10 mL), adsorbed on silica gel (230-400, 2.5 g) and purified by flash chromatography (hexane-EtOAc, 10: 90) to obtain analytically pure **10** (0.67 g, 75 %); Brown viscous liquid; IR (Neat)  $\nu$ : 3395, 3290, 2985, 1601, 1225, 1125, 1055  $\text{cm}^{-1}$ ;  $^1\text{H}$  NMR ( $\text{CDCl}_3$ , 400 MHz)  $\delta$ : 7.24-7.17 (m, 1H, Ar-H), 6.95-6.92 (m, 1H, Ar-H), 6.82-6.78 (m, 1H, Ar-H), 4.43-4.39 (m, 1H, CH), 4.06-4.00 (m, 2H, CH<sub>2</sub>), 3.70-3.67 (m, 2H, CH<sub>2</sub>), 3.70-3.32 (m, 1H, CH), 3.24-3.23 (m, 2H, CH<sub>2</sub>), 3.08-3.04 (m, 2H, CH<sub>2</sub>), 2.78 (s, 3H, CH<sub>3</sub>), 2.67 (brs, 1H, OH or NH), 2.38-2.36 (m, 2H, CH<sub>2</sub>), 2.04-1.97 (m, 2H, CH<sub>2</sub>);  $^{13}\text{C}$  NMR ( $\text{CDCl}_3$ , 100 MHz)  $\delta$ : 155.1 (d,  $J = 9$  Hz), 150.2 (dd,  $J = 14$  & 244 Hz), 145.0 (dd,  $J = 13$  & 237 Hz), 117.1 (d,  $J = 19$  Hz), 110.1 (q,  $J = 3$  Hz), 104.1 (d,  $J = 20$  Hz), 70.7, 64.5, 58.6, 53.3, 51.61, 50.4, 29.6; HRMS (ESI)  $m/z$  calcd for  $\text{C}_{15}\text{H}_{23}\text{F}_2\text{N}_2\text{O}_2$  [ $\text{M} + \text{H}^+$ ], 301.1728; Found 301.1728.

**Typical experimental procedure for the synthesis of lubeluzole (1) through N-arylation of 10 with 8:** The mixture of **10** (0.3 g, 1 mmol) and **8** (0.17 g, 1 mmol, 1 equiv) in water (2 mL) was stirred magnetically under at 110 °C (oil-bath) for 12 h (TLC). The reaction mixture cooled

to room temperature and treated with  $\text{NaHCO}_3$  till the effervescence ceases and extracted with EtOAc ( $2 \times 5$  mL). The combined EtOAc extracts were dried ( $\text{MgSO}_4$ ), and concentrated under rotary vacuum evaporation. The crude product was adsorbed on silica gel (230-400, 250 mg) and purified by flash chromatography (hexane-EtOAc, 80:20) to obtain analytically pure **1** (0.28 g, 64%).<sup>1</sup>

**Typical experimental procedure for the synthesis of **1** through *N*-arylation of **10** with **8** under microwave condition:** The mixture of **10** (0.3 g, 1 mmol) and **8** (0.17 g, 1 mmol, 1 equiv) in water (2 mL) was stirred magnetically under microwave 120 °C for 30 min (TLC). The reaction mixture cooled to room temperature and treated with  $\text{NaHCO}_3$  till the effervescence ceases and extracted with EtOAc ( $2 \times 5$  mL). The combined EtOAc extracts were dried ( $\text{MgSO}_4$ ), and concentrated under rotary vacuum evaporation. The crude product was adsorbed on silica gel (230-400, 250 mg) and purified by flash chromatography (hexane-EtOAc, 80:20) to obtain analytically pure **1** (0.36 g, 84%).<sup>1</sup>

**Typical experimental procedure for the synthesis of 1-(3-chloro-2-hydroxypropyl)piperidin-4-one (**13**):** The mixture of 4-piperidone (**12**) (0.49 g, 5 mmol) and **11** (0.46 g, 5 mmol, 1 equiv) in 5 mL water was stirred magnetically at rt for 1 h (TLC). The reaction mixture was extracted with EtOAc ( $2 \times 5$  mL). The combined EtOAc extracts were dried ( $\text{MgSO}_4$ ), and concentrated under rotary vacuum evaporation. The crude product was adsorbed on silica gel (230-400, 500 mg) and purified by column chromatography (hexane-EtOAc, 90:10) to obtain analytically pure **13** (0.91 g, 96%). Colourless liquid; IR (Neat)  $\nu$ : 3389, 3010, 2953, 1711, 1600, 1245, 1121  $\text{cm}^{-1}$ ;  $^1\text{H}$  NMR ( $\text{CDCl}_3$ , 400 MHz)  $\delta$ : 4.36-3.92 (m, 1H,  $\text{CH}$ ), 3.56-3.34 (m, 2H,  $\text{CH}_2$ ), 3.08-2.74 (m, 4H,  $\text{CH}_2$ ), 2.58-2.27 (m, 4H,  $\text{CH}_2$ ), 2.09-1.91 (m, 2H,  $\text{CH}_2$ );  $^{13}\text{C}$  NMR ( $\text{CDCl}_3$ , 100 MHz)  $\delta$ : 208.0, 67.4, 59.9, 53.5, 47.1, 41.1; HRMS (ESI)  $m/z$  calcd for  $\text{C}_8\text{H}_{15}\text{ClNO}_2$  [ $\text{M} + \text{H}^+$ ], 192.0791; Found 192.0793.

**Typical experimental procedure for the synthesis of 1-(3-(3,4-difluorophenoxy)-2-hydroxypropyl)piperidin-4-one (**15**) from 1-(3-chloro-2-hydroxypropyl)piperidin-4-one (**13**):** The mixture of **13** (0.19 g, 1 mmol) and **8** (0.13 g, 1 mmol, 1 equiv) and continue the stirring at 90 °C for 5 h (TLC). The reaction mixture was cooled to rt and neutralize with  $\text{NaHCO}_3$  (till the effervescence ceases) and extracted with EtOAc ( $2 \times 2$  mL). The combined

EtOAc extracts were dried (MgSO<sub>4</sub>), and concentrated under rotary vacuum evaporation. The crude product was adsorbed on silica gel (230-400, 500 mg) and purified by flash chromatography (hexane-EtOAc, 60:40) to obtain analytically pure **15** (0.27 g, 95%). Brown semi solid; IR (Neat)  $\nu$ : 3385, 3005, 2945, 2856, 1710, 1601, 1250, 1115 cm<sup>-1</sup>; <sup>1</sup>H NMR (CDCl<sub>3</sub>, 400 MHz)  $\delta$ : 7.10-7.03 (m, 1H, Ar-H), 6.78-6.74 (m, 1H, Ar-H), 6.64-6.62 (m, 1H, Ar-H), 4.12-4.11 (m, 1H, CH), 4.01-3.91 (m, 2H, CH<sub>2</sub>), 3.51 (brs, 1H, OH), 2.99-2.97 (m, 2H, CH<sub>2</sub>), 2.83-2.80 (m, 2H, CH<sub>2</sub>), 2.70-2.64 (m, 2H, CH<sub>2</sub>), 2.49 (s, 4H, CH<sub>2</sub>); <sup>13</sup>C NMR (CDCl<sub>3</sub>, 100 MHz)  $\delta$ : 208.3, 154.9 (dd,  $J$  = 2 & 8 Hz), 150.4 (dd,  $J$  = 13 & 246 Hz), 145.1 (dd,  $J$  = 13 & 239 Hz), 117.2 (d,  $J$  = 19 Hz), 109.8 (q,  $J$  = 3 Hz), 104.2 (d,  $J$  = 24 Hz), 70.0, 66.2, 59.2, 53.3, 41.0; HRMS (ESI)  $m/z$  calcd for C<sub>14</sub>H<sub>18</sub>F<sub>2</sub>NO<sub>3</sub> [M + H<sup>+</sup>], 286.1255; Found 286.1258.

**Typical experimental procedure for the one pot synthesis of 15:** The mixture of **12** (0.19 g, 2 mmol) and **11** (0.18 g, 2 mmol, 1 equiv) in 2 mL water was stirred magnetically at rt for 1 h (TLC) followed by addition of **8** (0.26 g, 2 mmol, 1 equiv) and continue stirring at 90 °C for further 5 h (TLC). The reaction mixture was cooled to rt and neutralize with NaHCO<sub>3</sub> (till the effervescence ceases) and extracted with EtOAc (2 × 4 mL). The combined EtOAc extracts were dried (MgSO<sub>4</sub>), and concentrated under rotary vacuum evaporation. The crude product was adsorbed on silica gel (230-400, 500 mg) and purified by flash chromatography (hexane-EtOAc, 60:40) to obtain analytically pure **15** (0.48 g, 85%).

**Typical experimental procedure for the synthesis of 10 from 15:** The mixture of **15** (0.28 g, 1 mmol), methylamine hydrochloride (0.13 g, 2 mmol, 2 equiv), titanium(IV) isopropoxide (2 mmol, 2 equiv) and Et<sub>3</sub>N (0.2 g, 2 mmol, 2 equiv) in EtOH (4 mL) was stirred magnetically at room temperature for 8 h followed by addition of NaBH<sub>4</sub> (1.5 mmol, 1.5 equiv) and continue the stirring for further 8 h. The reaction mixture was filtered off to remove the catalyst and concentrated the filtrate under rotary vacuum evaporation. The crude product was adsorbed on silica gel (230-400, 250 mg) and purified by flash chromatography (hexane-EtOAc, 10: 90) to obtain analytically pure **10** (0.26 g, 87 %).

**Typical experimental procedure for the (S)-15:** The mixture of **12** (0.29 g, 3 mmol) and (S)-**11** (0.27 g, 3 mmol, 1 equiv) in 3 mL water was stirred magnetically at rt for 1 h (TLC) followed by addition of **14** (0.39 g, 3 mmol, 1 equiv) and continue stirring at 90 °C for further 5 h (TLC). The reaction mixture was cooled to rt and neutralize with NaHCO<sub>3</sub> (till the effervescence ceases) and

extracted with EtOAc ( $2 \times 6$  mL). The combined EtOAc extracts were dried ( $\text{MgSO}_4$ ), and concentrated under rotary vacuum evaporation. The crude product was adsorbed on silica gel (230-400, 500 mg) and purified by flash chromatography (hexane-EtOAc, 60:40) to obtain analytically pure (*S*)-**15** (0.72 g, 84%);  $[\alpha]_{\text{D}}$ : -15.2 ( $c=1$ , DCM).

**Typical experimental procedure for the synthesis of *S*-10 from *S*-15:** The mixture of *S*-**15** (0.28 g, 1 mmol), methylamine hydrochloride (0.13 g, 2 mmol, 2 equiv), titanium(IV) isopropoxide (2 mmol, 2 equiv) and  $\text{Et}_3\text{N}$  (0.2 g, 2 mmol, 2 equiv) in EtOH (4 mL) was stirred magnetically at room temperature for 8 h followed by addition of  $\text{NaBH}_4$  (1.5 mmol, 1.5 equiv) and continue the stirring for further 8 h. The reaction mixture was filtered off to remove the catalyst and concentrated the filtrate under rotary vacuum evaporation. The crude product was adsorbed on silica gel (230-400, 250 mg) and purified by flash chromatography (hexane-EtOAc, 10: 90) to obtain analytically pure **10** (264 mg, 88 %).  $[\alpha]_{\text{D}}$ : - 12.5 ( $c=1$ , DCM).

**Typical experimental procedure for the synthesis of (*S*)-1:** The mixture of (*S*)-**10** (0.3 g, 1 mmol) and **8** (0.16 g, 1 mmol, 1 equiv) in water (2 mL) was stirred magnetically under at 120 °C under microwave for 30 min (TLC). The reaction mixture cooled to room temperature and treated with  $\text{NaHCO}_3$  till the effervescence ceases and extracted with EtOAc ( $2 \times 3$  mL). The combined EtOAc extracts were dried ( $\text{MgSO}_4$ ), and concentrated under rotary vacuum evaporation. The crude product was adsorbed on silica gel (230-400, 250 mg) and purified by flash chromatography (hexane-EtOAc, 80:20) to obtain analytically pure (*S*)-**1** (0.36 g, 83%).  $[\alpha]_{\text{D}}$ : -11.7 ( $c=1$ ,  $\text{CHCl}_3$ ) [lit.<sup>1</sup>  $[\alpha]_{\text{D}}$ : -11.4 ( $c=1$ ,  $\text{CHCl}_3$ )].

## References

1. Bruno, C.; Carocci, A.; Catalano, A.; Cavalluzzi, M. M.; Corbo, F.; Franchini, C.; Lentini, G.; Tortorella, V. *Chirality* 2006, 18, 227.

## Scanned NMR spectra

### $^1\text{H}$ NMR of 2-((3,4-difluorophenoxy)methyl)oxirane (3)

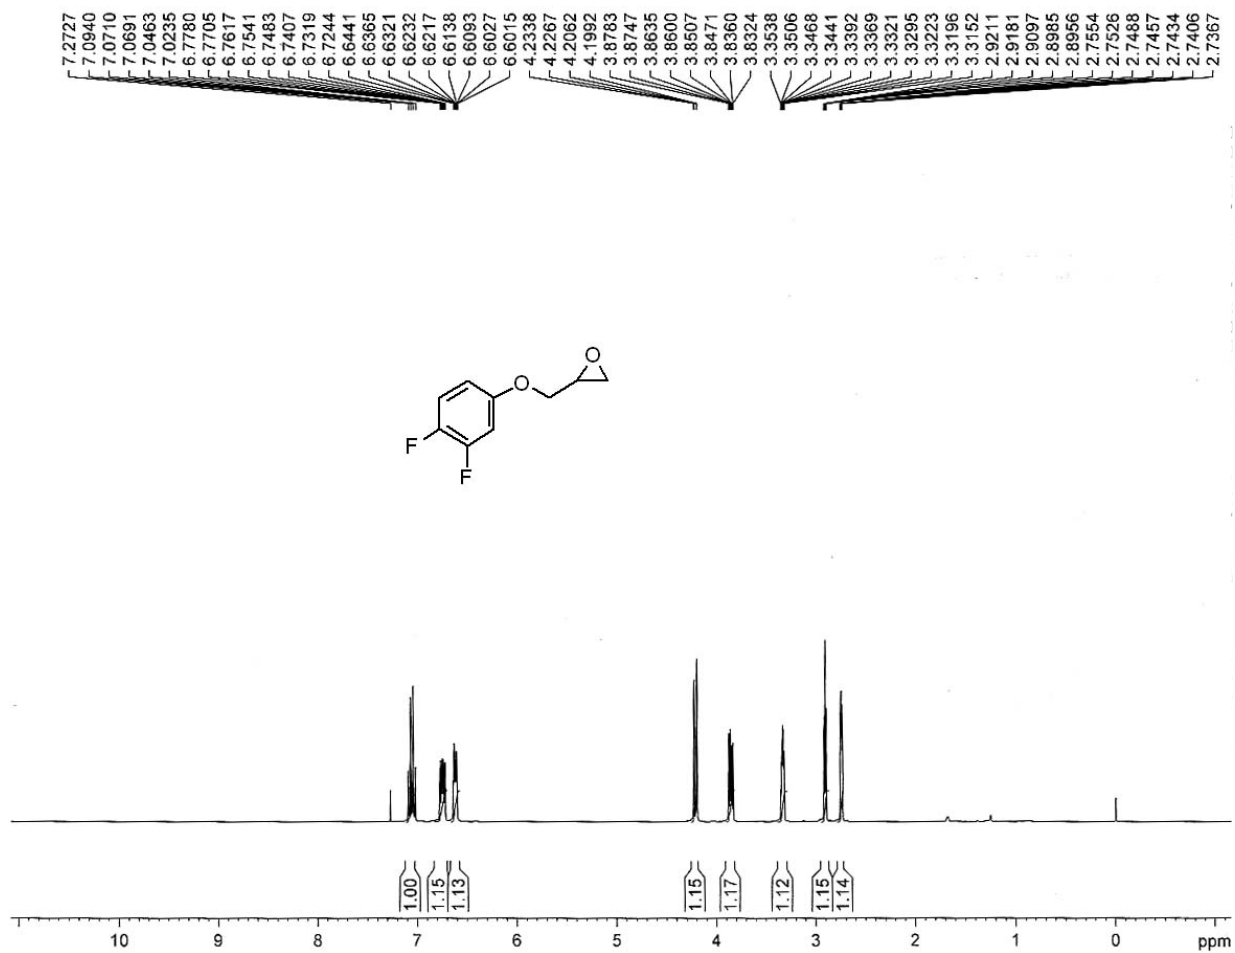



# <sup>1</sup>H NMR of 1-(4-aminopiperidin-1-yl)-3-(3,4-difluorophenoxy)propan-2-ol (7)

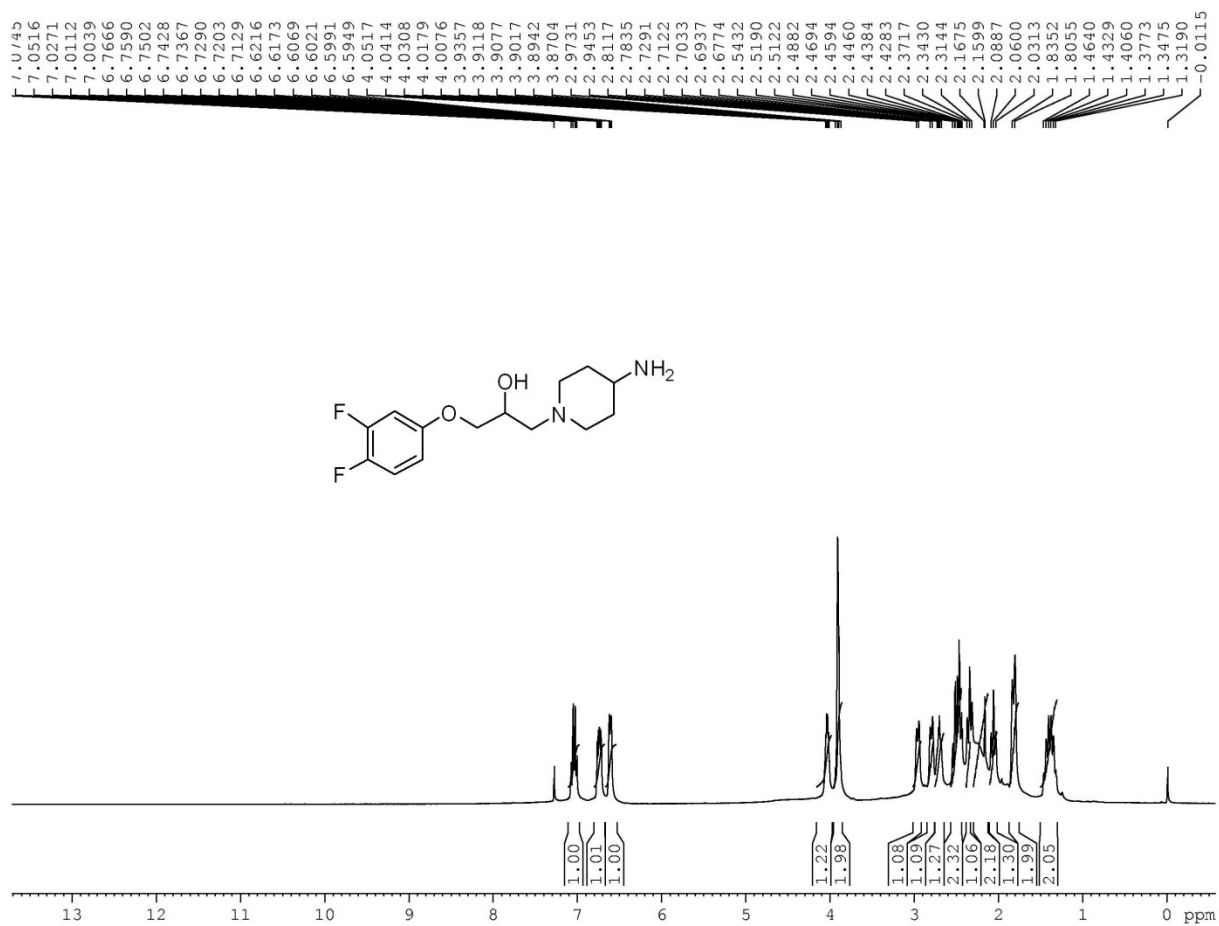

**<sup>13</sup>C NMR of 1-(4-aminopiperidin-1-yl)-3-(3,4-difluorophenoxy)propan-2-ol (7)**

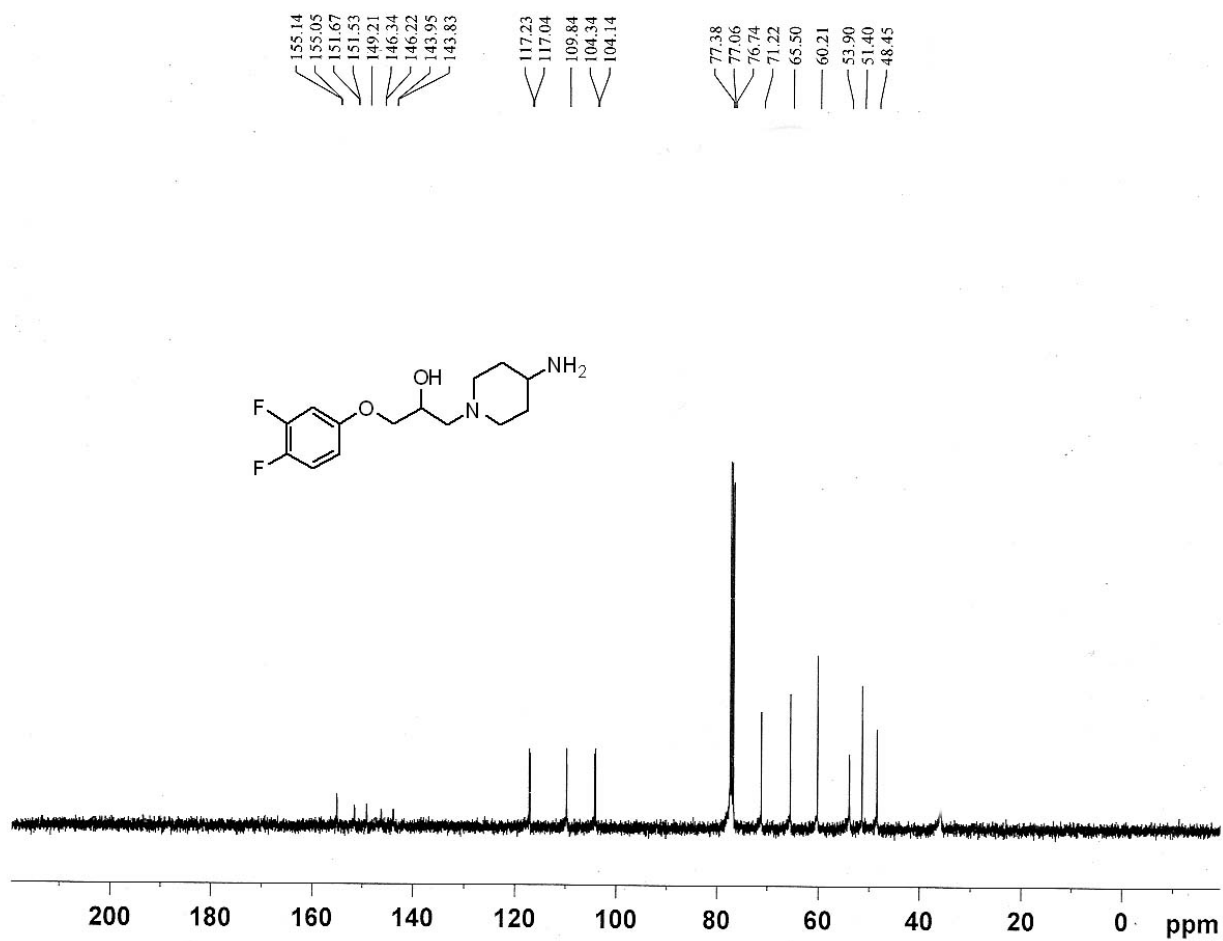

**<sup>1</sup>H NMR of 1-(4-(benzothiazol-2-ylamino)piperidin-1-yl)-3-(3,4-difluorophenoxy)propan-2-ol (9)**

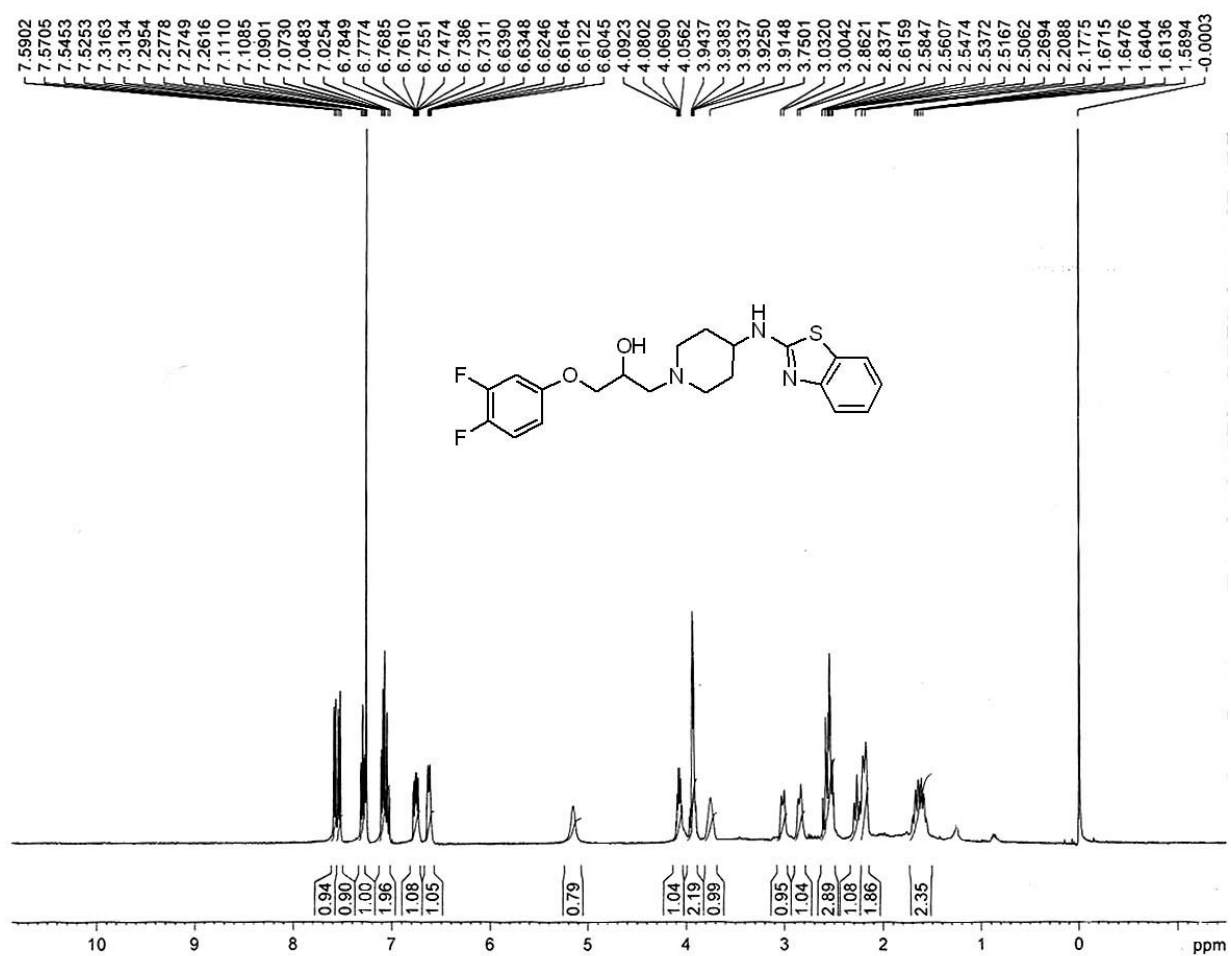

**<sup>13</sup>C NMR of 1-(4-(benzothiazol-2-ylamino)piperidin-1-yl)-3-(3,4-difluorophenoxy)propan-2-ol (9)**

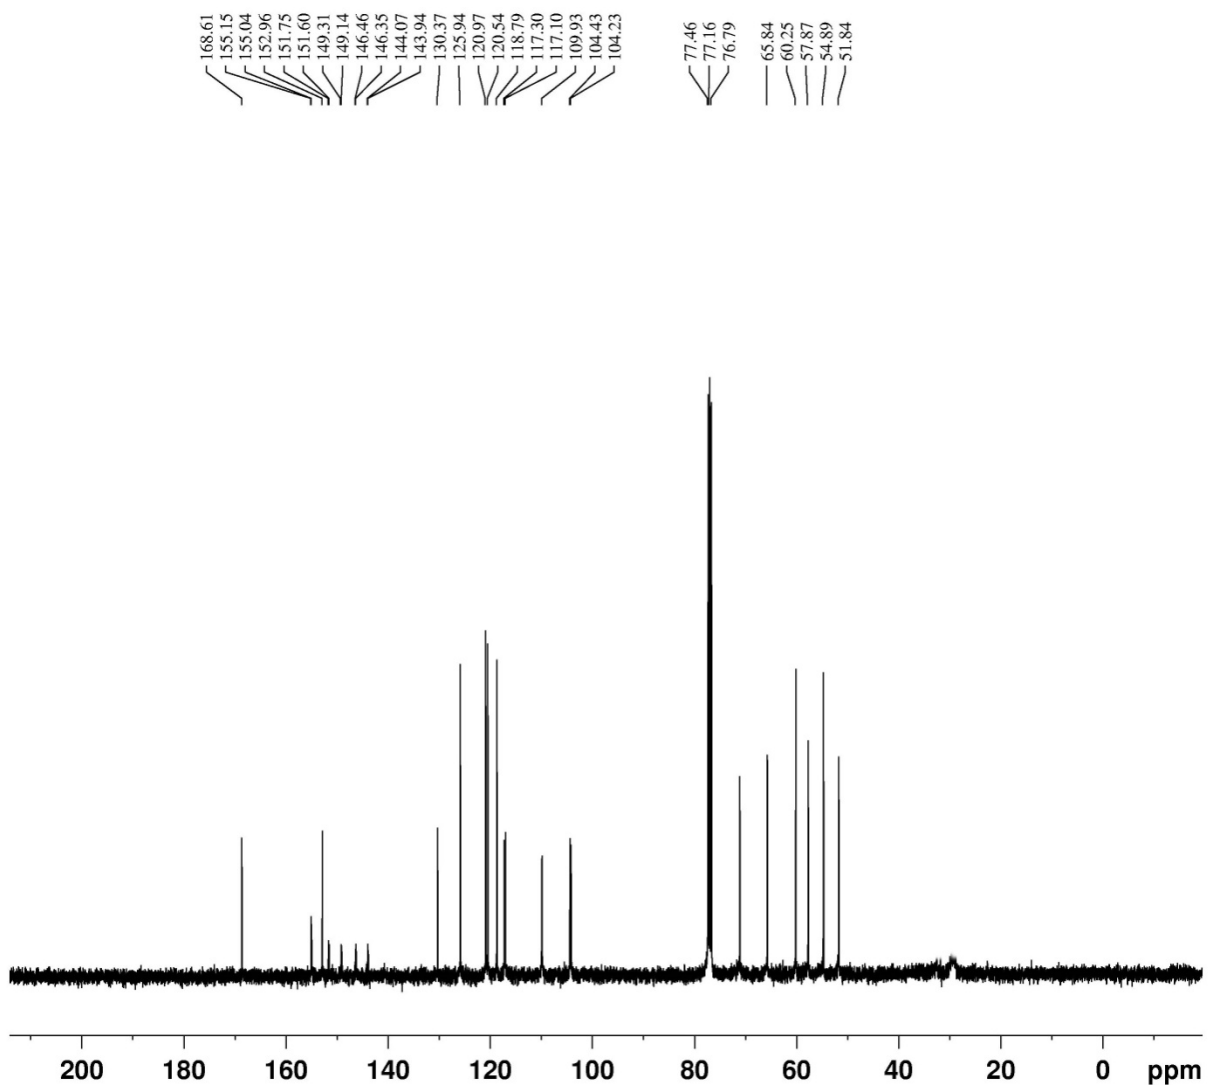

# <sup>1</sup>H NMR of lubeluzole (1)

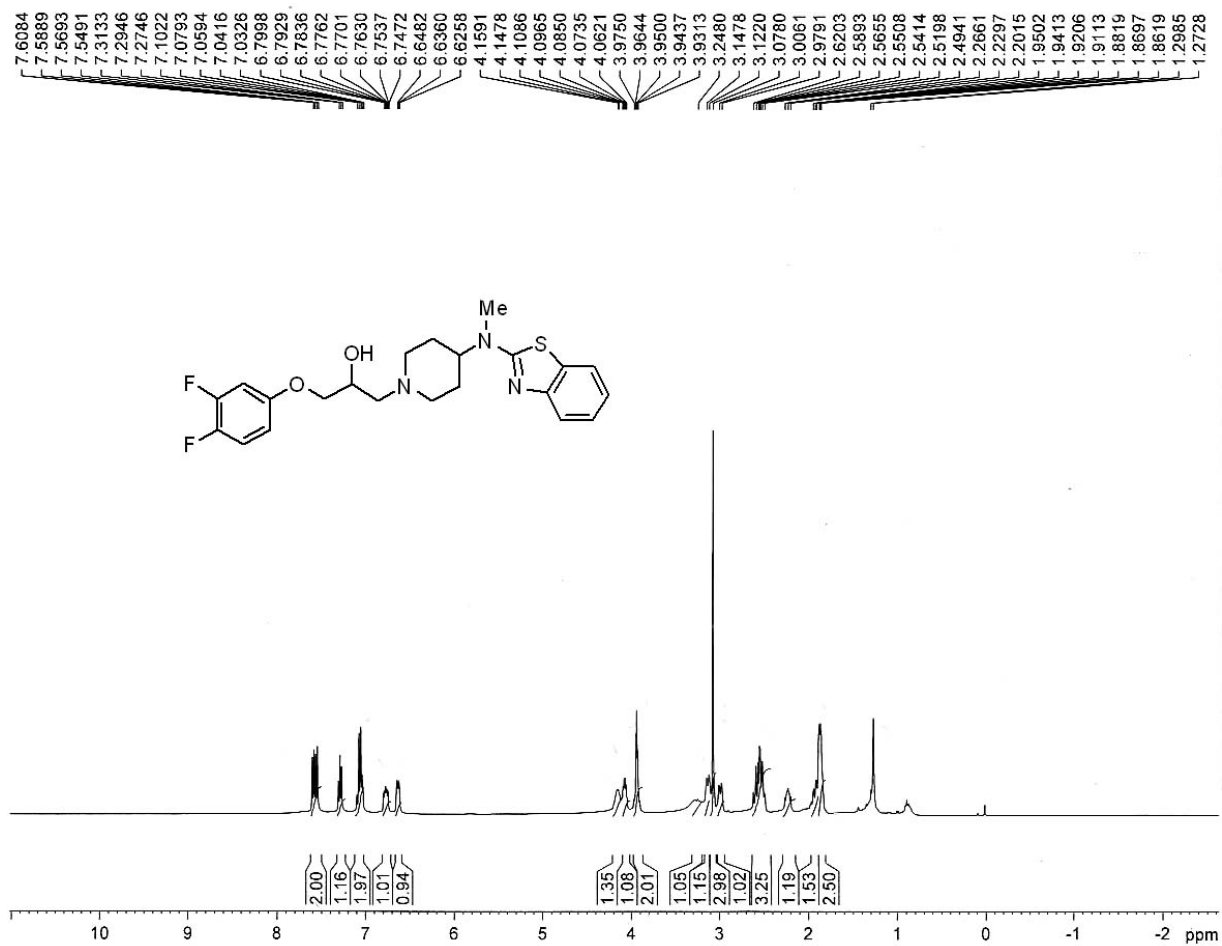

**<sup>1</sup>H NMR of 1-(3,4-difluorophenoxy)-3-(4-(methylamino)piperidin-1-yl)propan-2-ol (10)**

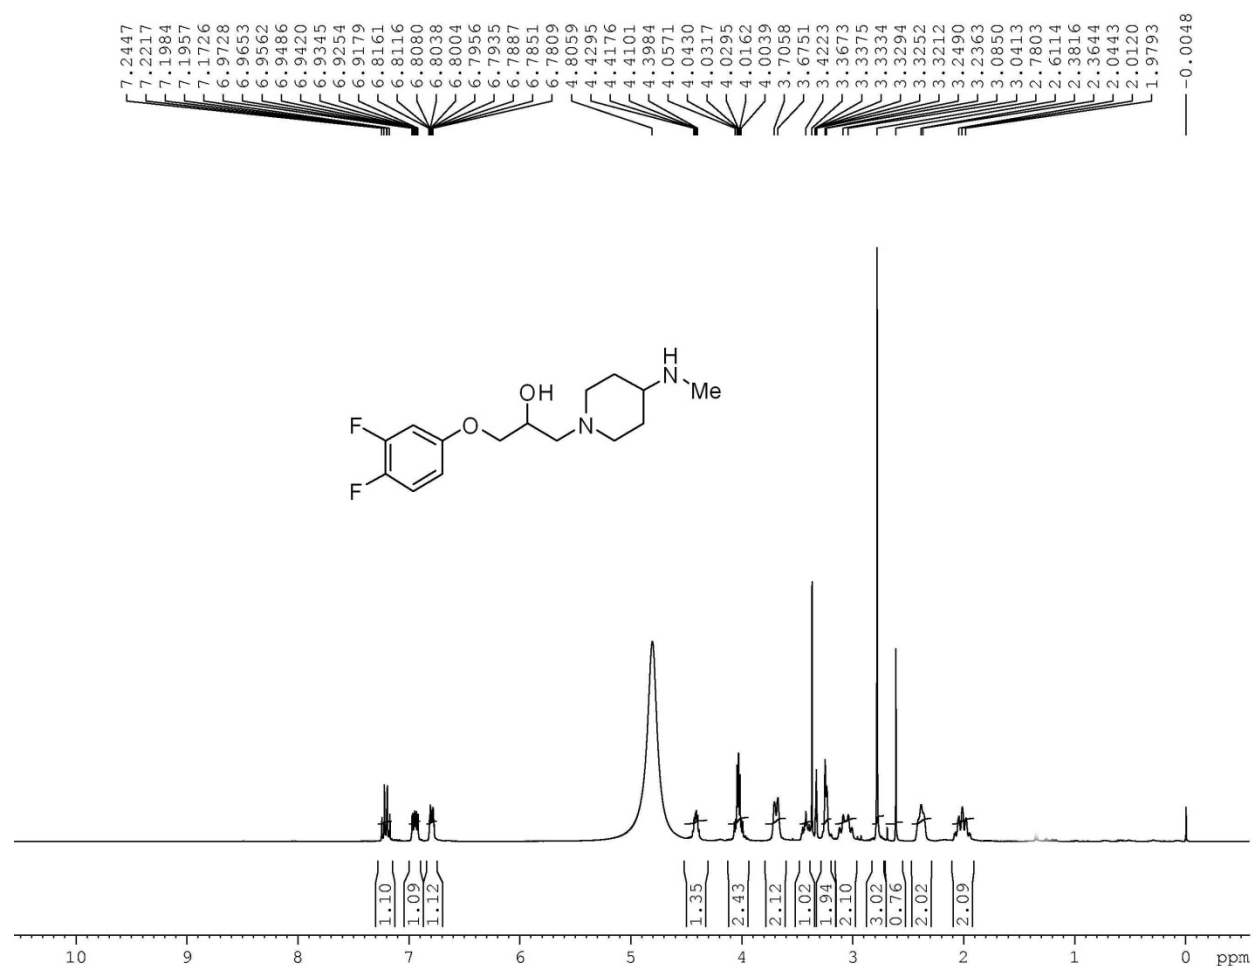

**$^{13}\text{C}$  NMR of 1-(3,4-difluorophenoxy)-3-(4-(methylamino)piperidin-1-yl)propan-2-ol (10)**

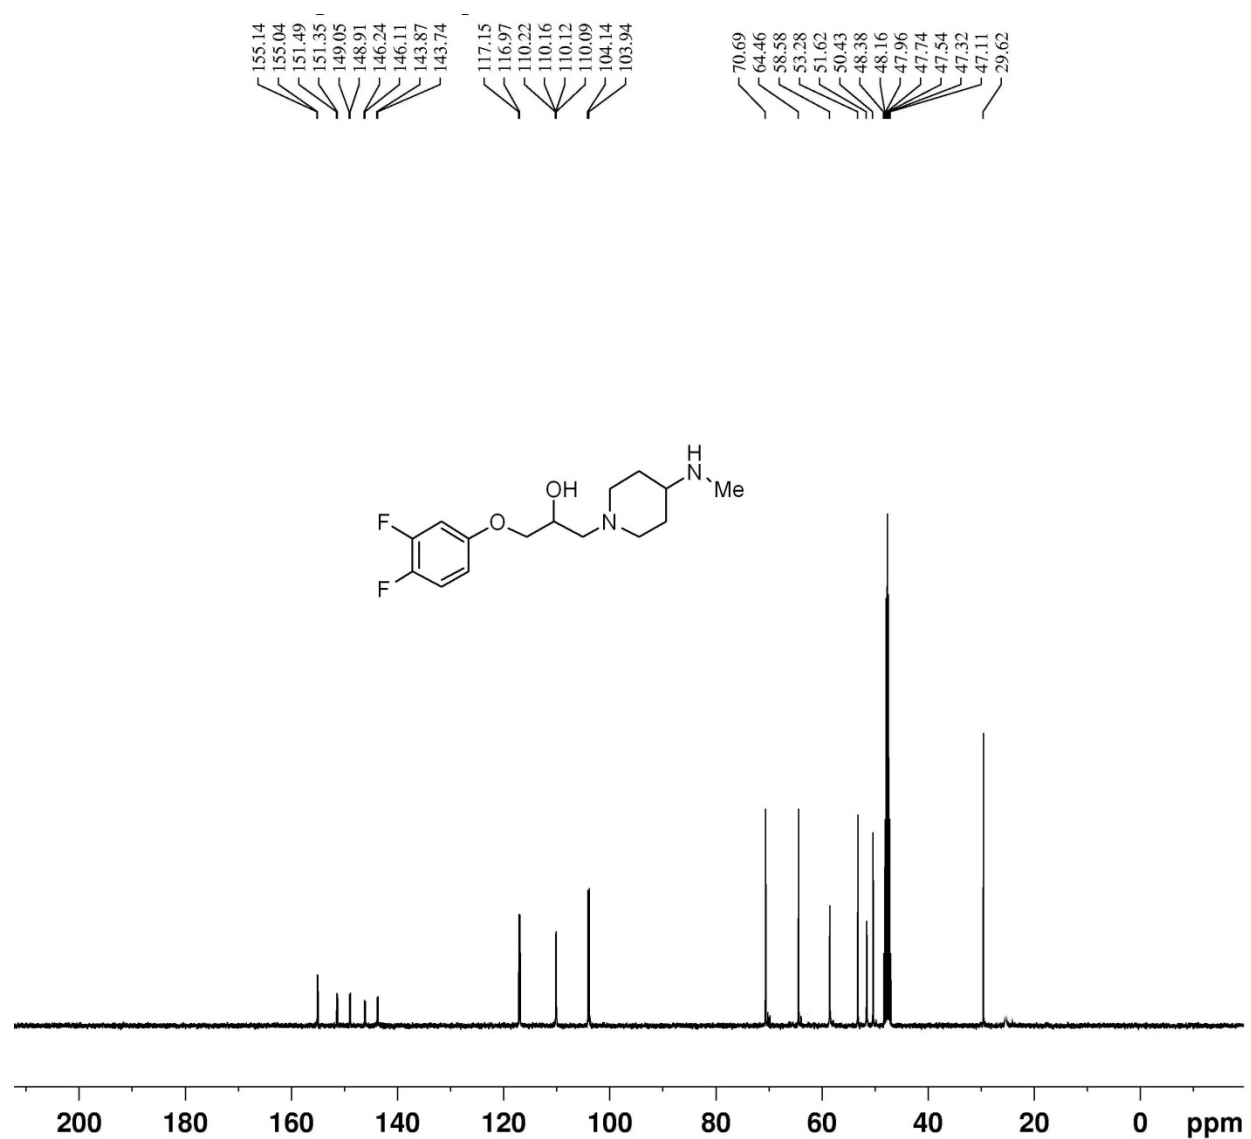

# <sup>1</sup>H NMR of 1-(3-chloro-2-hydroxypropyl)piperidin-4-one (13)

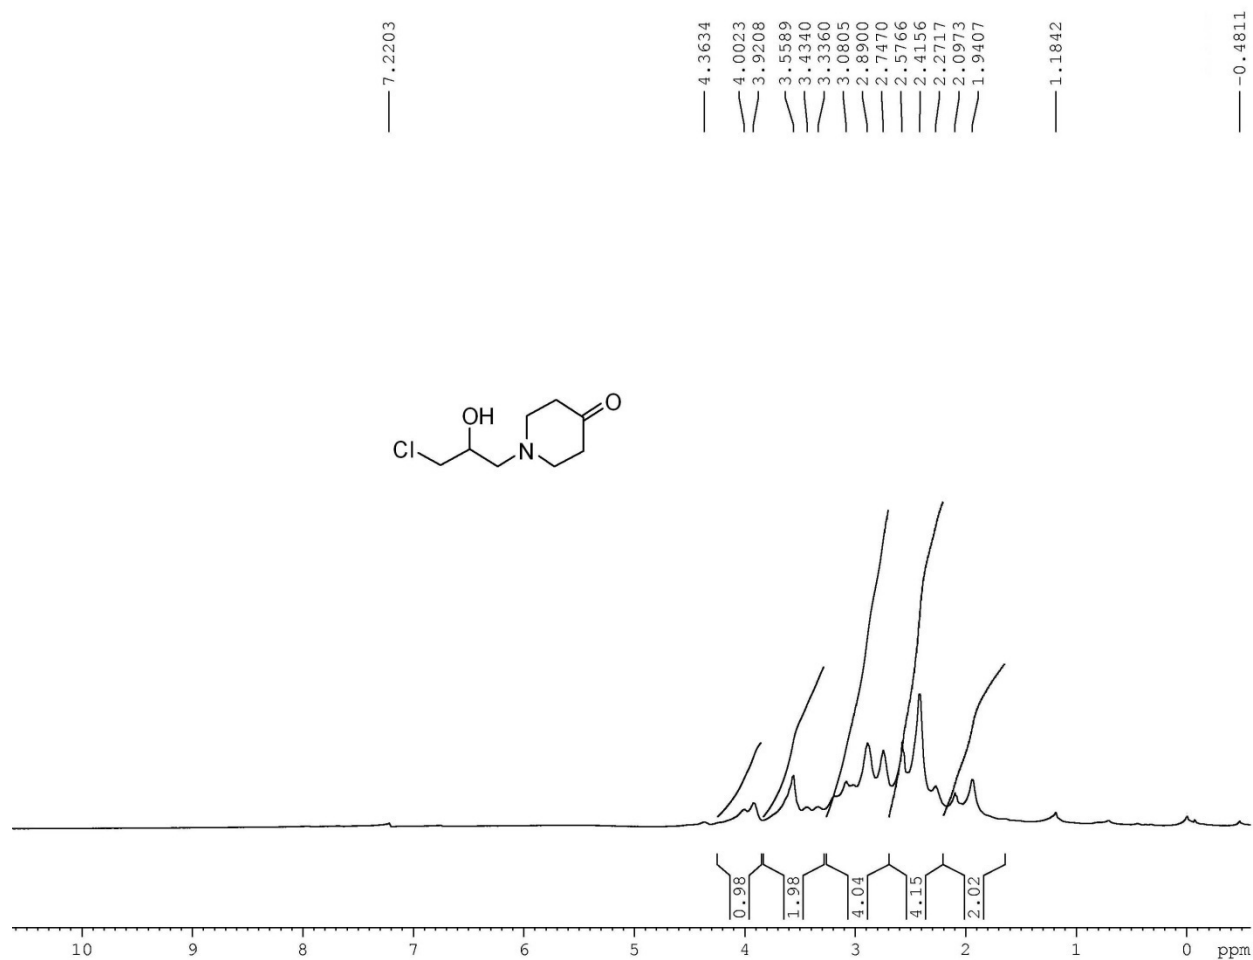



# <sup>13</sup>C NMR of 1-(3-chloro-2-hydroxypropyl)piperidin-4-one (13)

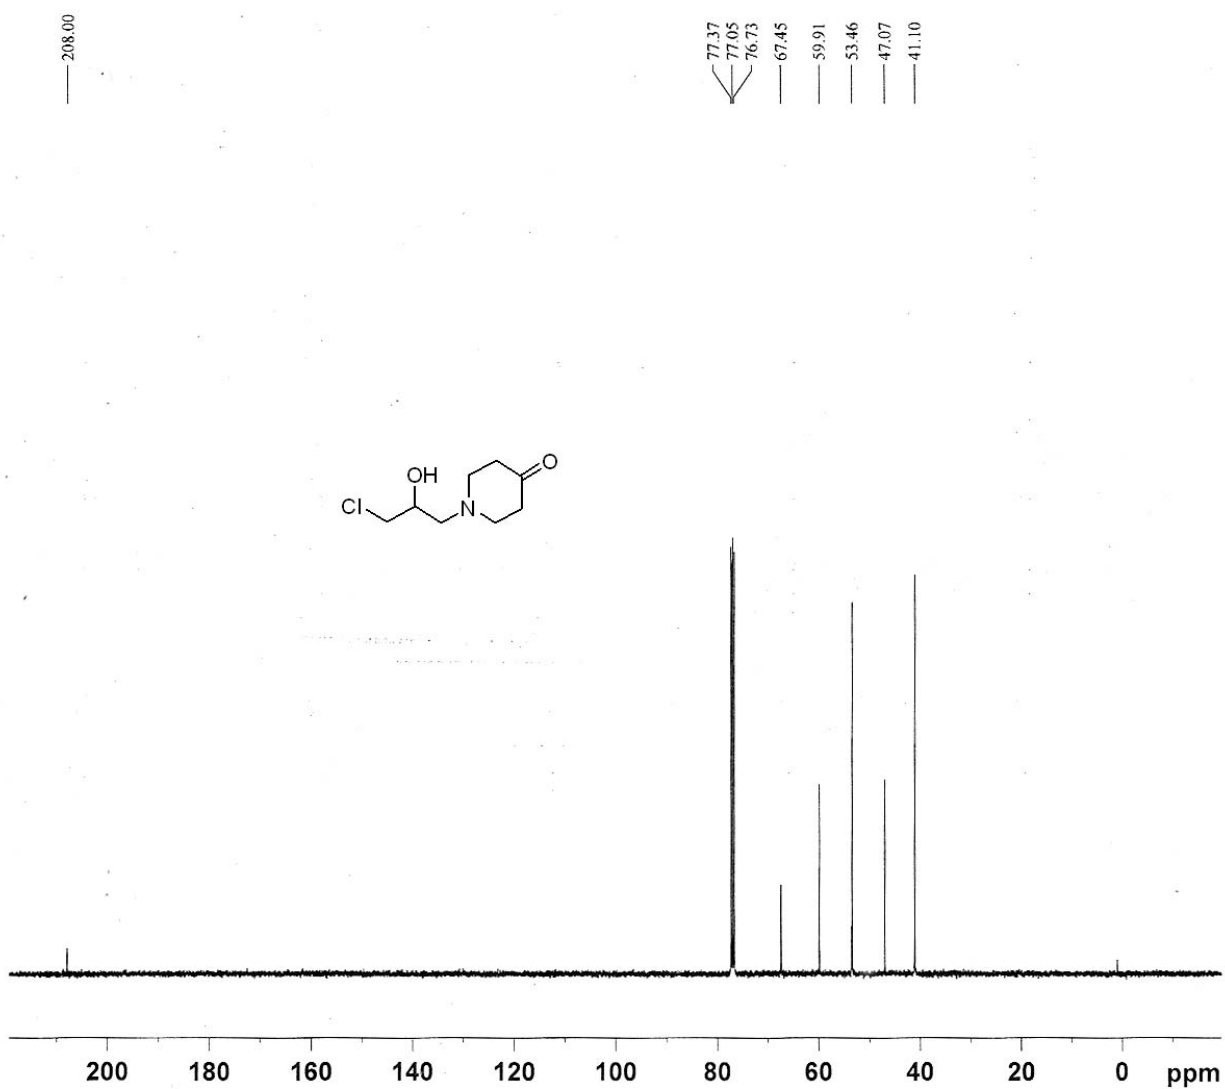

# <sup>1</sup>H NMR of 1-(3-(3,4-difluorophenoxy)-2-hydroxypropyl)piperidin-4-one (15)

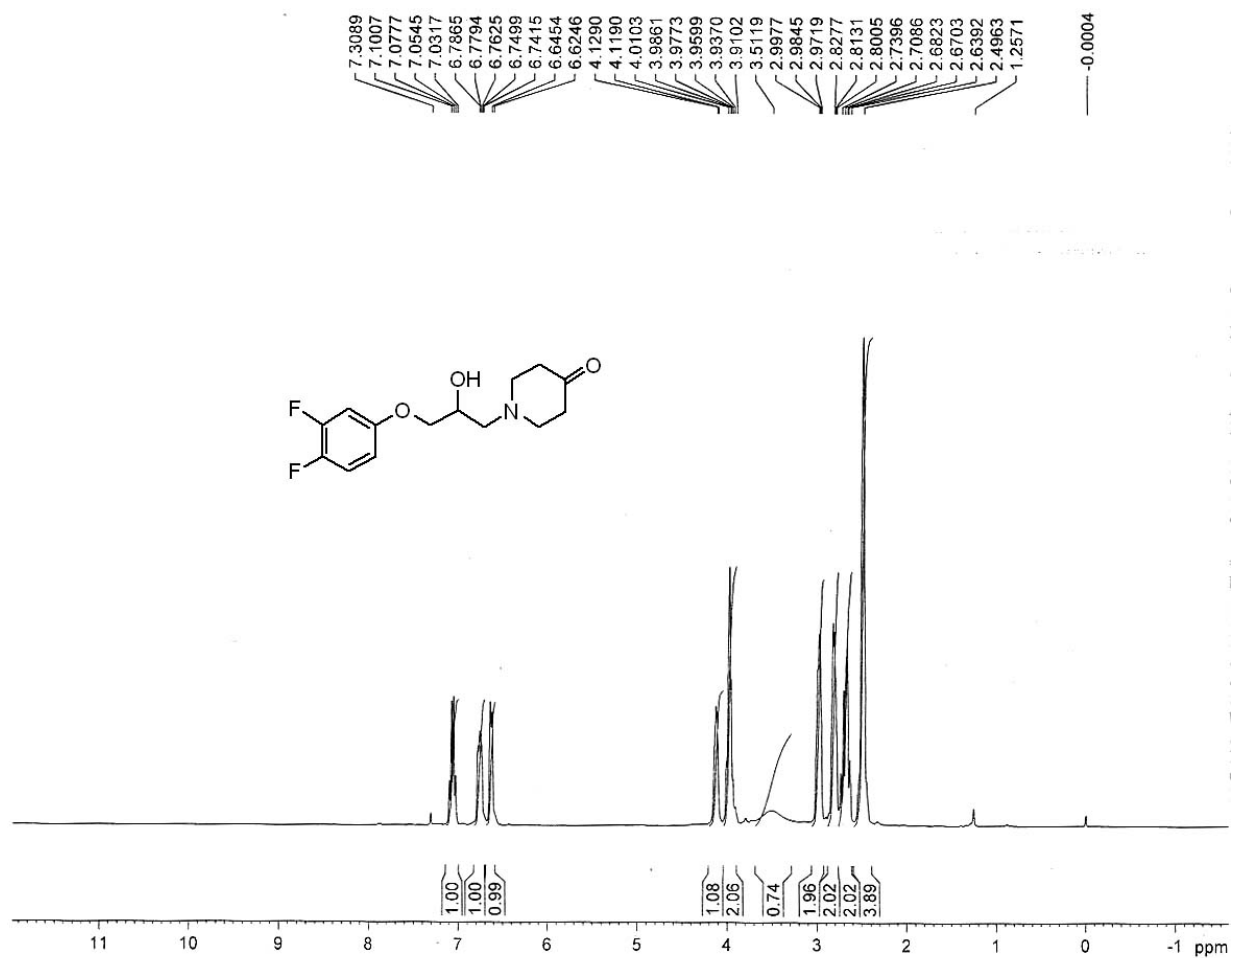

**<sup>13</sup>C NMR of 1-(3-(3,4-difluorophenoxy)-2-hydroxypropyl)piperidin-4-one (15)**

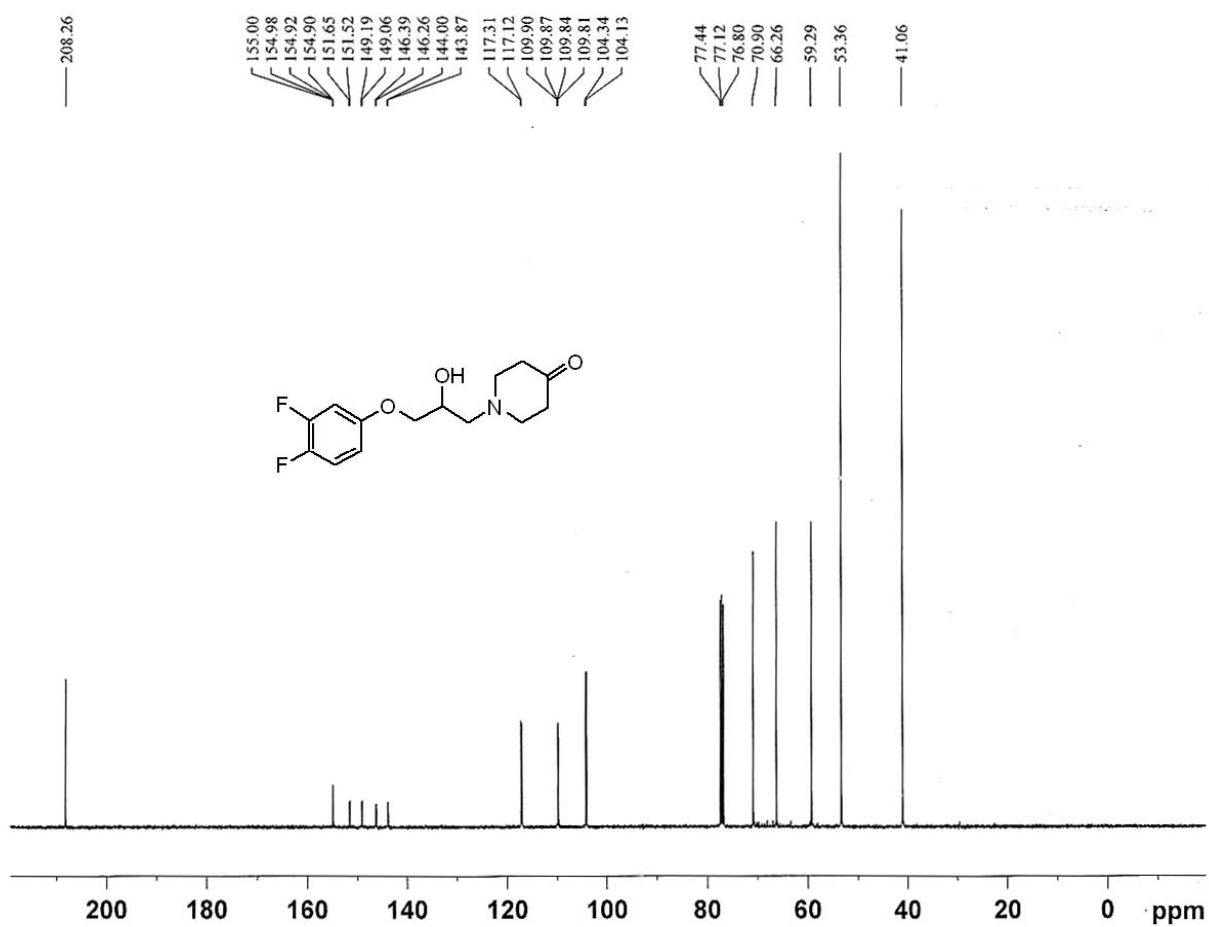

# HPLC profile of (RS)- 1-(3-(3,4-difluorophenoxy)-2-hydroxypropyl)piperidin-4-one (15) on Chiral Column

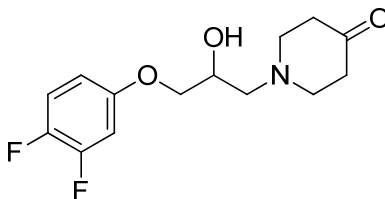

(RS)- 1-(3-(3,4-difluorophenoxy)-2-hydroxypropyl)piperidin-4-one

## <Chromatogram>

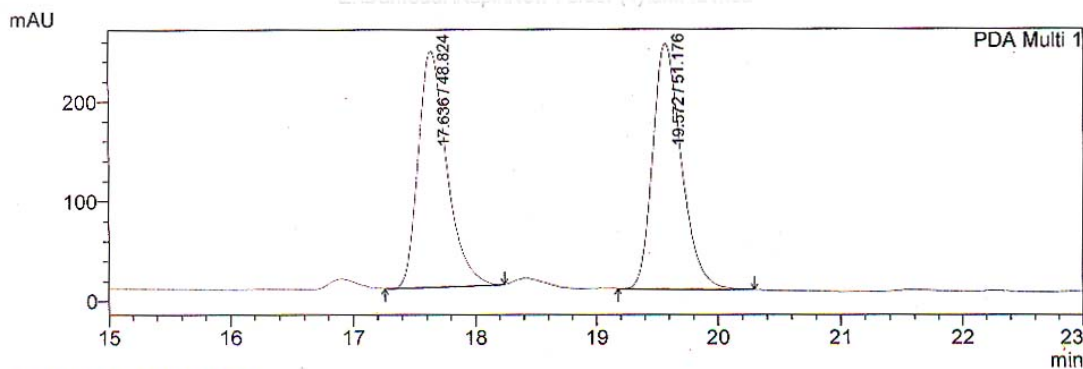

1 PDA Multi 1/254nm 4nm

PeakTable

| Peak# | Ret. Time | Area    | Height | Area %  | Height % |
|-------|-----------|---------|--------|---------|----------|
| 1     | 17.636    | 3851089 | 237048 | 48.824  | 49.105   |
| 2     | 19.572    | 4036593 | 245689 | 51.176  | 50.895   |
| Total |           | 7887683 | 482737 | 100.000 | 100.000  |

Eluent: Hexane-<sup>i</sup>Propanol-Diethylamine (90:10: 0.1)

Flow Rate: 1 mL/min

Chiral Column: AD-H

UV Detector Wavelength: 254 nm

## HPLC profile of (S)- 1-(3-(3,4-difluorophenoxy)-2-hydroxypropyl)piperidin-4-one (S-15) on Chiral Column

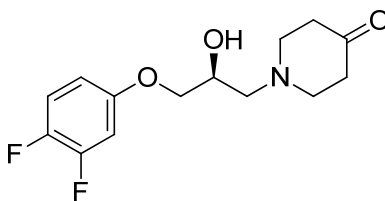

(S)- 1-(3-(3,4-difluorophenoxy)-2-hydroxypropyl)piperidin-4-one

### <Chromatogram>

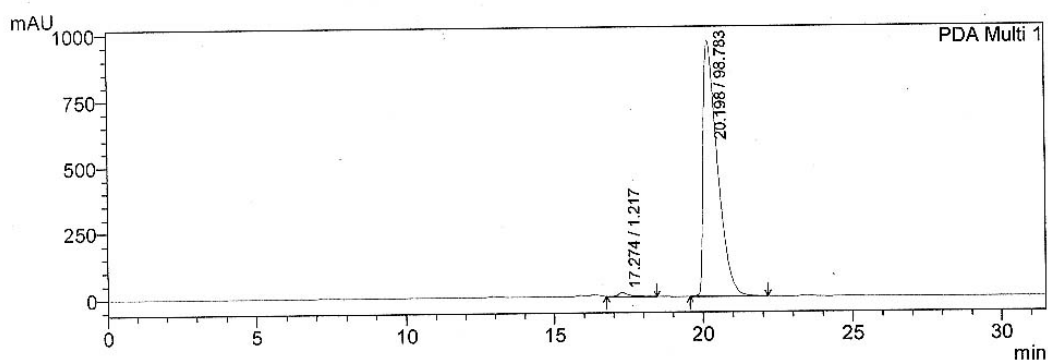

1 PDA Multi 1/254nm 4nm

PeakTable

PDA ChI 254nm 4nm

| Peak# | Ret. Time | Area     | Height | Area %  | Height % |
|-------|-----------|----------|--------|---------|----------|
| 1     | 17.274    | 392873   | 15553  | 1.217   | 1.587    |
| 2     | 20.198    | 31884645 | 964366 | 98.783  | 98.413   |
| Total |           | 32277518 | 979918 | 100.000 | 100.000  |

**Eluent:** Hexane-<sup>i</sup>Propanol-Diethylamine (90:10: 0.1)

**Flow Rate:** 1 mL/min

**Chiral Column:** AD-H

**UV Detector Wavelength:** 254 nm

## HPLC profile of (RS)-Lubeluzole (S-1) on Chiral Column

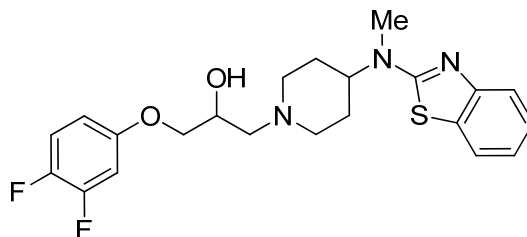

**(RS)-Lubeluzole**

<Chromatogram>

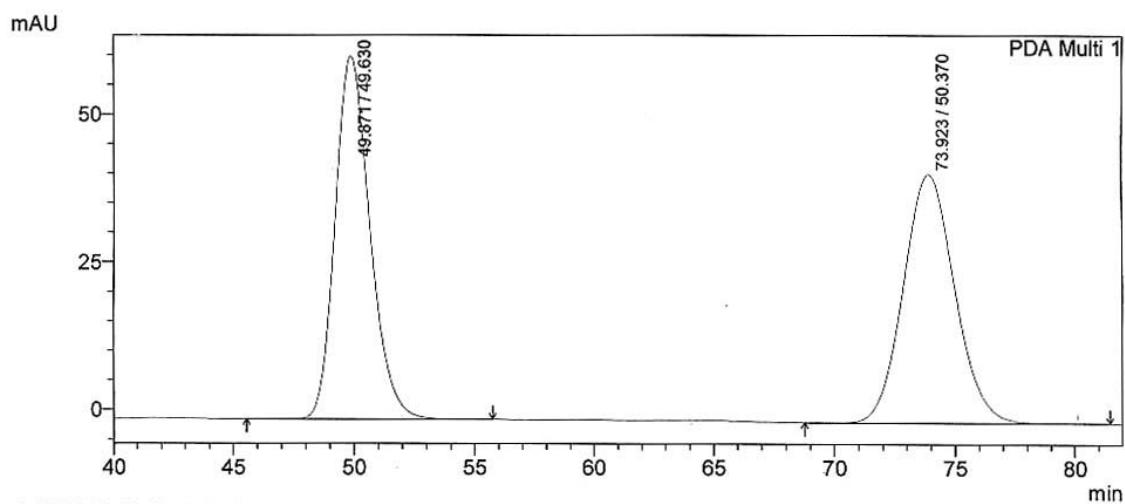

PeakTable

| Peak# | Ret. Time | Area     | Height | Area %  | Height % |
|-------|-----------|----------|--------|---------|----------|
| 1     | 49.871    | 6140123  | 61398  | 49.630  | 59.387   |
| 2     | 73.923    | 6231594  | 41988  | 50.370  | 40.613   |
| Total |           | 12371717 | 103386 | 100.000 | 100.000  |

**Eluent: Hexane-*i*-Propanol-Diethylamine (83:17: 0.1)**

**Flow Rate: 0.8 mL/min**

**Chiral Column: AD-H**

**UV Detector Wavelength: 256 nm**

## HPLC profile of (S)-Lubeluzole (S-1) on Chiral Column

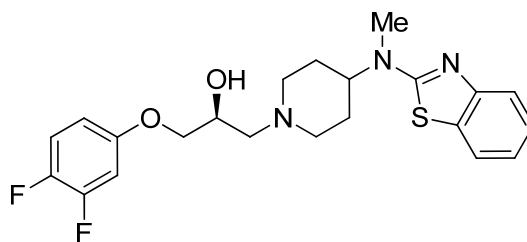

(S)-Lubeluzole

### <Chromatogram>

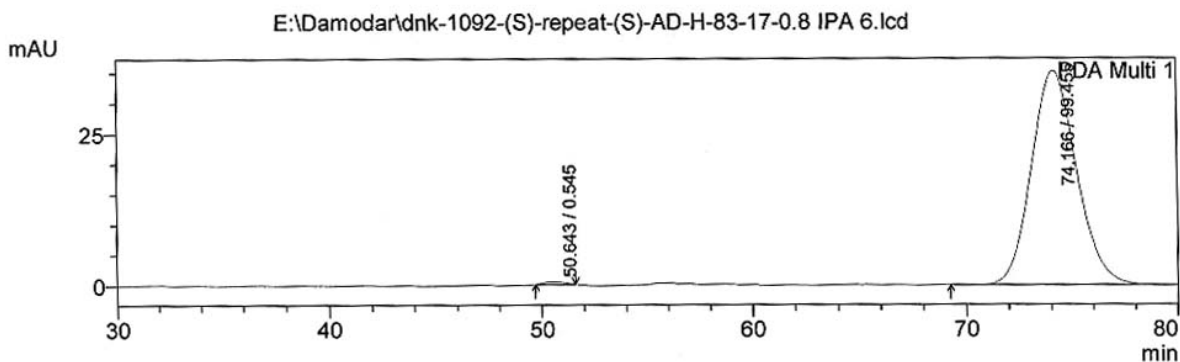

PDA Ch1 256nm 4nm

PeakTable

| Peak# | Ret. Time | Area    | Height | Area %  | Height % |
|-------|-----------|---------|--------|---------|----------|
| 1     | 50.643    | 28487   | 429    | 0.545   | 1.204    |
| 2     | 74.166    | 5201106 | 35176  | 99.455  | 98.796   |
| Total |           | 5229593 | 35604  | 100.000 | 100.000  |

**Eluent: Hexane-Propanol-Diethylamine (83:17: 0.1)**

**Flow Rate: 0.8 mL/min**

**Chiral Column: AD-H**

**UV Detector Wavelength: 256 nm**

## Structure, IUPAC name, and mass-spectrometry-based identification and estimation of this side product 7a

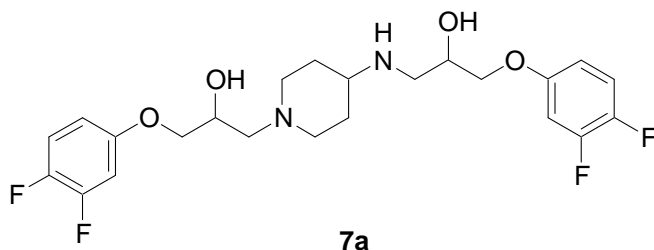

1-(3,4-Difluoro-phenoxy)-3-{4-[3-(3,4-difluoro-phenoxy)-2-hydroxy-propylamino]-piperidin-1-yl}-propan-2-ol

The APCI and ESI MS analyses of the product isolated during the reaction of **3** and **6** under various conditions (table 1) revealed the formation of **7a** as the side product which would arise out of reaction of the initially formed **7** with the starting glycidyl ether **3**. All the attempts to isolate the side product **7a** were unsuccessful. The observed ratio of conversion to **7a** (table 1, footnotes d and e) was estimated based on the “ion-current” measurement of the mass peak 473.29 [M + H]<sup>+</sup> (corresponding to 7a) and the mass peak 287.20 [M + H]<sup>+</sup> (corresponding to **7**) by subjecting the crude reaction mixture to the (+ve) ESI-MS analyses.

**Typical Experimental Procedure for determination Ion current using +pESIMS:** The mixture of **3** (1.86 g, 10 mmol), **6** (1.0 g, 10 mmol, 1 equiv) in TFE (4 mL) was stirred magnetically at 10 °C. After completion of reaction (2 h, TLC), an aliquot portion (20 µL) of the reaction mixture were taken out by micro pipette and dissolved in MeOH (1 mL). From the resultant solution an aliquot amount (10 µL) was subjected to +ve ESI MS in advance Thermo Scientific LTQ-XL mass spectrometer.

The abundance of characteristics species for the model reaction

| Ion @         |               | Ratio |
|---------------|---------------|-------|
| m/z of 287.20 | m/z of 473.29 |       |
| 1264586700    | 645024435     | 1.96  |



## +ve ESI MS Spectra of reaction mixture

13-01-11-KS-394C\_121217150939 #38 RT: 0.18 AV: 1 NL: 7.20E6  
T: ITMS + c ESI Full ms [50.00-500.00]

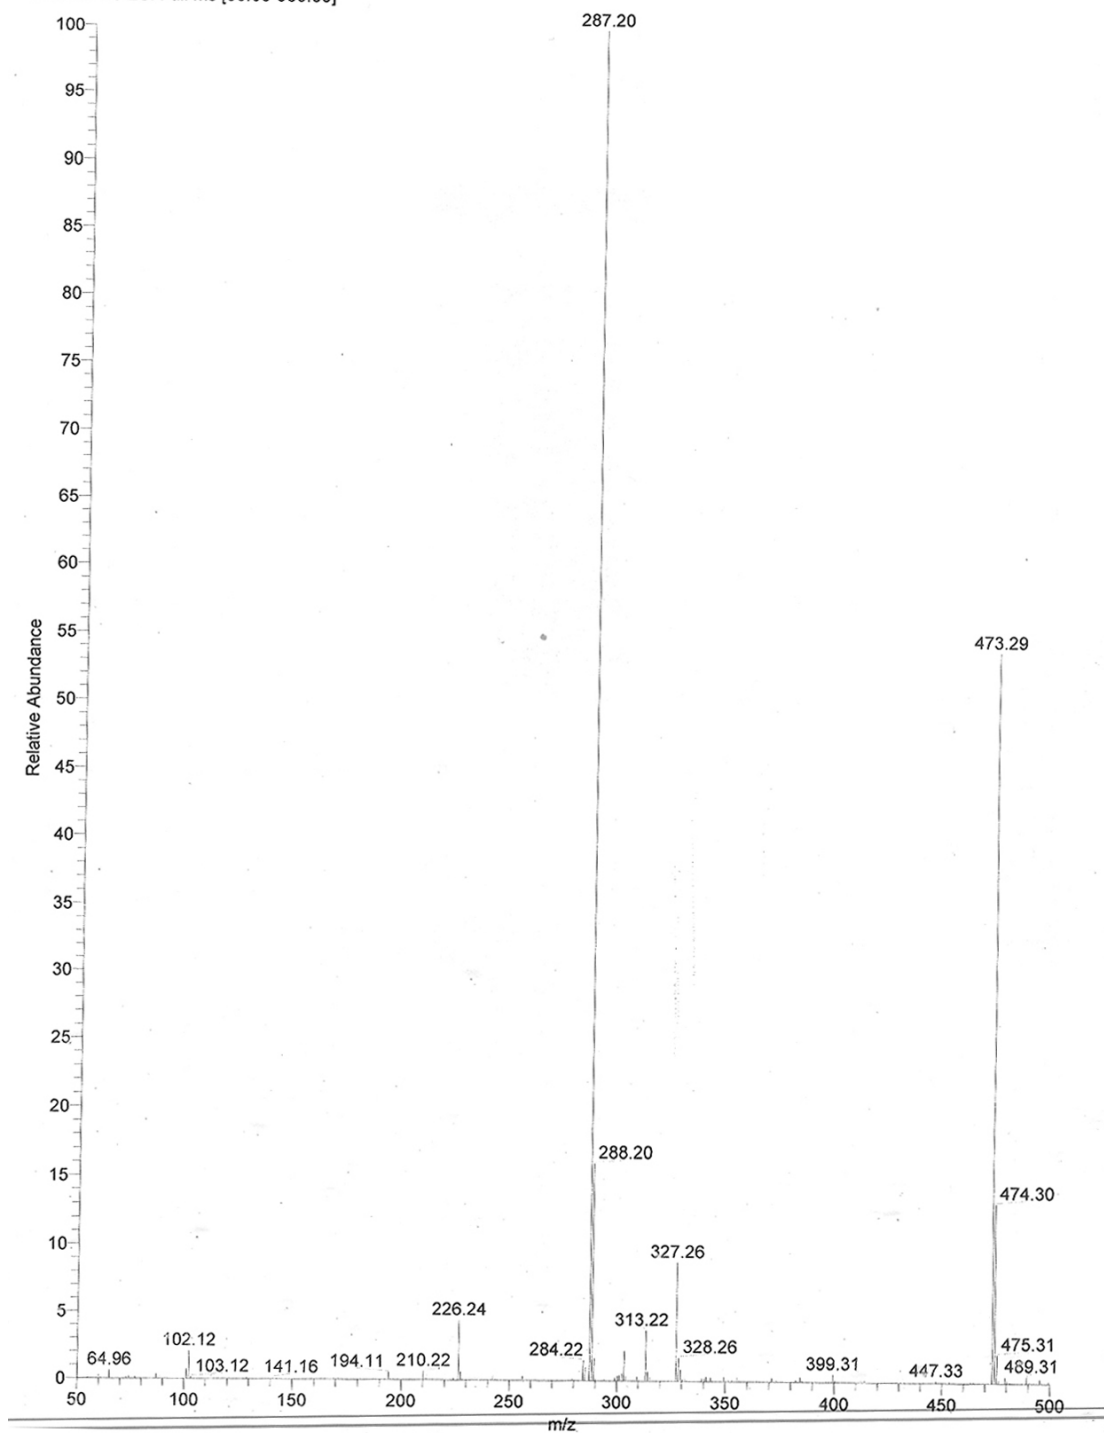

**“Ion current” measurement of mass peak 473.29 [M + H]<sup>+</sup> (corresponding to 7a) and the mass peak 287.20 [M + H]<sup>+</sup> (corresponding to 7) by +ve ESI MS**

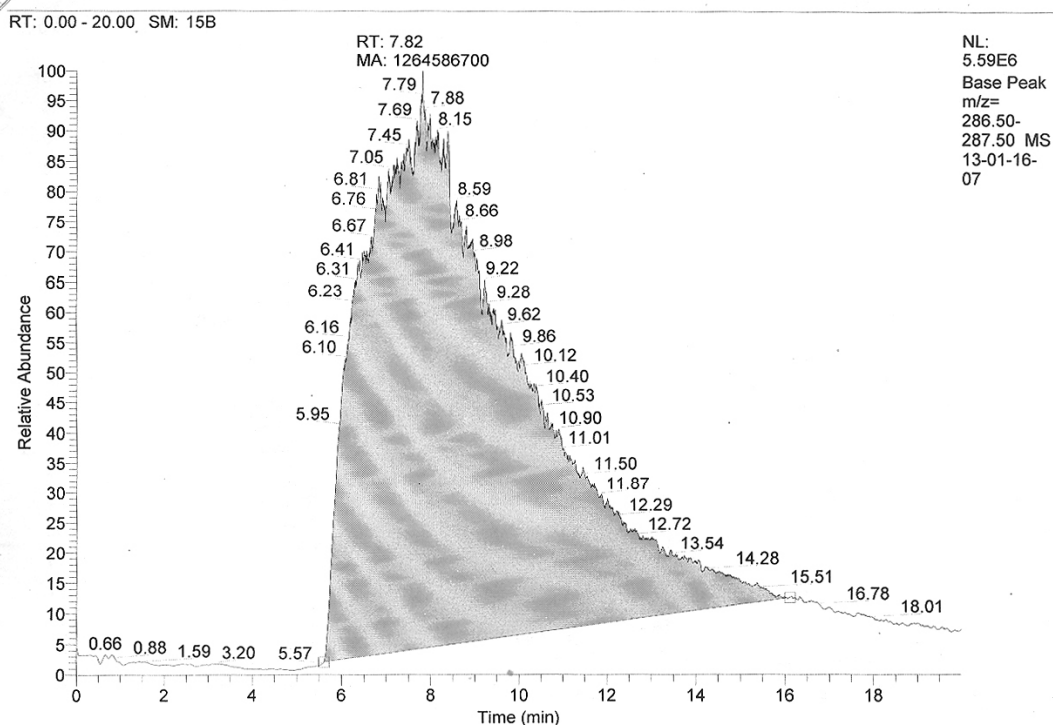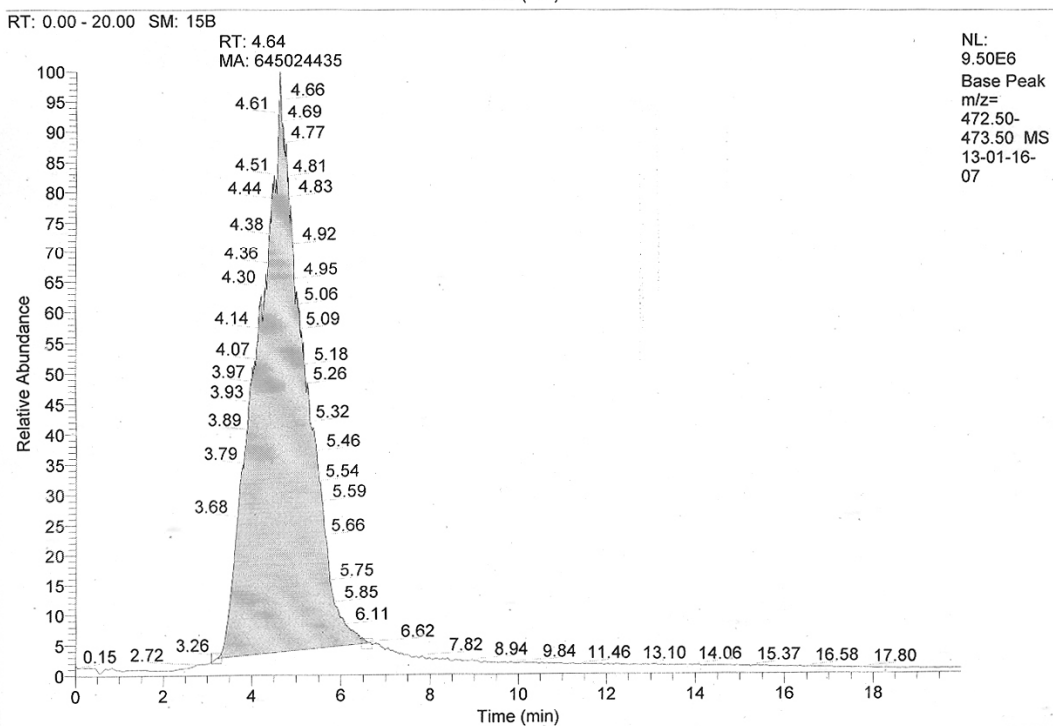

Supplement: Supplementary file 1 [file 4076461]
